# Supplementary material
Source: PubMed Central journal article supplement (PMC5272794)
Supplement: supp_WNL.0000000000003509_appendix_e1.pdf [file supp_WNL.0000000000003509_appendix_e1.pdf]

## Appendix e-1. Search Strategy

### Medline Search

- 1 exp Incidence/ (142499)
- 2 exp Prevalence/ (144996)
- 3 exp Epidemiology/ (18044)
- 4 1 or 2 or 3 (290988)
- 5 (seizure or epilepsy or convulsion).mp. [mp=title, original title, abstract, name of substance word, subject heading word, unique identifier] (104550)
- 6 4 and 5 (2073)
- 7 exp seizures/ep [Epidemiology] (1119)
- 8 exp epilepsy/ep [Epidemiology] (5235)
- 9 6 or 7 or 8 (6035)
- 10 limit 9 to yr="1985 -Current" (5408)
- 11 limit 10 to animals (217)
- 12 10 not 11 (5191)

### Embase Search

- 1 exp INCIDENCE/ (199054)
- 2 exp PREVALENCE/ (253235)
- 3 \*EPIDEMIOLOGY/ (22250)
- 4 1 or 2 or 3 (450799)
- 5 (convulsion or epilepsy or seizure).mp. [mp=title, abstract, subject headings, heading word, drug trade name, original title, device manufacturer, drug manufacturer] (183275)
- 6 4 and 5 (5948)
- 7 exp convulsion/ep [Epidemiology] (78)
- 8 exp epilepsy/ep [Epidemiology] (3330)
- 9 exp seizure/ep [Epidemiology] (921)
- 10 6 or 7 or 8 or 9 (1433)
- 11 limit 10 to yr="1985 -Current" (8215)
- 12 limit 11 to animals (154)
- 13 11 not 12 (8061)
