# Supplementary material
Source: PubMed Central journal article supplement (PMC5272794)
Supplement: supp_WNL.0000000000003509_appendix_e3.pdf [file supp_WNL.0000000000003509_appendix_e3.pdf]

### Appendix e-3. Included References

41. Adelow C, Andell E, Amark P, et al. Newly diagnosed single unprovoked seizures and epilepsy in Stockholm, Sweden: First report from the Stockholm Incidence Registry of Epilepsy (SIRE). *Epilepsia*. 2009;50:1094-101.
42. Al Rajeh S, Bademosi O, Ismail H, et al. A community survey of neurological disorders in Saudi Arabia: the Thughbah study. *Neuroepidemiology*. 1993;12:164-78.
43. Al Rajeh S, Awada A, Bademosi O, et al. The prevalence of epilepsy and other seizure disorders in an Arab population: a community-based study. *Seizure*. 2001;10:410-4.
44. Al Salloum AA, El Mouzan MI, Al Omar AA, et al. The prevalence of neurological disorders in Saudi children: A community-based study. *Journal of Child Neurology*. 2011;26:21-4.
45. Almu S, Tadesse Z, Cooper P, et al. The prevalence of epilepsy in the Zay Society, Ethiopia--an area of high prevalence. *Seizure*. 2006;15:211-3.
46. Annegers JF, Dubinsky S, Coan SP, et al. The incidence of epilepsy and unprovoked seizures in multiethnic, urban health maintenance organizations. *Epilepsia*. 1999;40:502-6.
47. Asawavichienjinda T, Sitthi-Amorn C, Tanyanont W. Prevalence of epilepsy in rural Thailand: a population-based study. *J Med Assoc Thai*. 2002;85:1066-73.
48. Astradsson A, Olafsson E, Ludvigsson P, et al. Rolandic epilepsy: an incidence study in Iceland. *Epilepsia*. 1998;39:884-6.
49. Attia-Romdhane N, Mrabet, A, Larnaout, A, Samoud, S, Hamda, A, Hamda, M, Oueslati, S. Prevalence study of neurologic disorders in Kelibia (Tunisia). *Neuroepidemiology*. 1993;12:285-99.
50. Attia-Romdhane N, Mrabet A, Ben Hamida M. Prevalence of epilepsy in Kelibia, Tunisia. *Epilepsia*. 1993;34:1028-32.
51. Avode GH, Tevoedjre D, Adjien M, Guedou, F. Epilepsy in schools in Cotonou (Benin). *AJNS - African Journal of Neurological Sciences*. 2003;22.
52. Aydin A, Ergor A, Ergor G, et al. The prevalence of epilepsy amongst school children in Izmir, Turkey. *Seizure*. 2002;11:392-6.
53. Aziz H, Ali SM, Frances P, et al. Epilepsy in Pakistan: a population-based epidemiologic study. *Epilepsia*. 1994;35:950-8.

54. Aziz H, Akhtar SW, Hasan KZ. Epilepsy in Pakistan: stigma and psychosocial problems. A population-based epidemiologic study. *Epilepsia*. 1997;38:1069-73.
55. Aziz H, Guvener A, Akhtar SW, et al. Comparative epidemiology of epilepsy in Pakistan and Turkey: population-based studies using identical protocols. *Epilepsia*. 1997;38:716-22.
56. Balogou AA, Grunitzky EK, Belo M, et al. Management of epilepsy patients in Batamariba district, Togo. *Acta Neurol Scand*. 2007;116:211-6.
57. Banerjee TKH, A. Biswas, A. Ray, J. Roy, T. Chaudhuri, A. Das, SK. Neurological Disorders in Children and Adolescents. *Indian Journal of Pediatrics*. 2009;76:139-46.
58. Bar-Dayana Y, Arnson Y, Elishkevits K. Screening for common neurologic diseases among Israeli adolescents. *J Child Neurol*. 2010;25:348-51.
59. Basch EM, Cruz ME, Tapia D, et al. Prevalence of epilepsy in a migrant population near Quito, Ecuador. *Neuroepidemiology*. 1997;16:94-8.
60. Beilmann A, Napa A, Soot A, et al. Prevalence of childhood epilepsy in Estonia. *Epilepsia*. 1999;40:1011-9.
61. Beilmann A, Napa A, Hamarik M, et al. Incidence of childhood epilepsy in Estonia. *Brain Dev*. 1999;21:166-74.
62. Benavente I, Rubio E, Morales C, et al. Prevalence of epilepsy amongst adolescents in Huesca, Spain: a community-based study. *Eur J Neurol*. 2009;16:1138-43.
63. Benn EK, Hauser WA, Shih T, et al. Estimating the incidence of first unprovoked seizure and newly diagnosed epilepsy in the low-income urban community of Northern Manhattan, New York City. *Epilepsia*. 2008;49:1431-9.
64. Bharucha NE, Bharucha EP, Bharucha AE, et al. Prevalence of epilepsy in the Parsi community of Bombay. *Epilepsia*. 1988;29:111-5.
65. Bielen I, Cvitanovic-Sojat L, Bergman-Markovic B, et al. Prevalence of epilepsy in Croatia: a population-based survey. *Acta Neurol Scand*. 2007;116:361-7.
66. Birbeck GL, Kalichi EM. Epilepsy prevalence in rural Zambia: a door-to-door survey. *Trop Med Int Health*. 2004;9:92-5.
67. Blichfeldt S, Bille T, Nielsen IM, et al. Epilepsy among children in Greenland. *Int J Circumpolar Health*. 2004;63 Suppl 2:363-5.
68. Bondestam S, Garssen J, Abdulwakil AI. Prevalence and treatment of mental disorders and epilepsy in Zanzibar. *Acta Psychiatr Scand*. 1990;81:327-31.

69. Borges MA, Min LL, Guerreiro CA, et al. Urban prevalence of epilepsy: populational study in Sao Jose do Rio Preto, a medium-sized city in Brazil. *Arq Neuropsiquiatr*. 2004;62:199-204.
70. Boyle CA, Decoufle P, Yeargin-Allsopp M. Prevalence and health impact of developmental disabilities in US children. *Pediatrics*. 1994;93:399-403.
71. Breteler MM, de la Court A, Meinardi H, et al. Prevalence of epilepsy in the elderly: the Rotterdam Study. *Epilepsia*. 1996;37:141-7.
72. Brodtkorb E, Sjaastad O. Epilepsy prevalence by individual interview in a Norwegian community. *Seizure*. 2008;17:646-50.
73. Calisir N, Bora I, Irgil E, et al. Prevalence of epilepsy in Bursa city center, an urban area of Turkey. *Epilepsia*. 2006;47:1691-9.
74. Casetta I, Pugliatti M, Faggioli R, et al. Incidence of childhood and adolescence epilepsy: A community-based prospective study in the province of Ferrara and in Copparo, Italy, 1996-2005. *European Journal of Neurology*. 2012;19:312-6.
75. Celikkas E, Erdinc OO, Metintas S, et al. Incidence of epilepsy in a defined area of Central Anatolia, Turkey, after 15 years of age. *Neuroepidemiology*. 2010;35:221-5.
76. Chen CC, Chen TF, Hwang YC, et al. Population-based survey on prevalence of adult patients with epilepsy in Taiwan (Keelung community-based integrated screening no. 12). *Epilepsy Res*. 2006;72:67-74.
77. Chong J, Kudrimoti HS, Lopez DC, et al. Behavioral risk factors among Arizonans with epilepsy: Behavioral Risk Factor Surveillance System 2005/2006. *Epilepsy Behav*. 2010;17:511-9.
78. Chong J, Hesdorffer DC, Thurman DJ, et al. The prevalence of epilepsy along the Arizona-Mexico border. *Epilepsy Research*. 2013;105:206-15.
79. Christensen J, Vestergaard M, Pedersen MG, et al. Incidence and prevalence of epilepsy in Denmark. *Epilepsy Res*. 2007;76:60-5.
80. Christianson AL, Zwane ME, Manga P, et al. Epilepsy in rural South African children--prevalence, associated disability and management. *S Afr Med J*. 2000;90:262-6.
81. Coleman R, Lopyy L, Walraven G. The treatment gap and primary health care for people with epilepsy in rural Gambia. *Bull World Health Organ*. 2002;80:378-83.
82. Cornaggia CM, Canevini MP, Christe W, et al. Epidemiologic survey of epilepsy among Army draftees in Lombardy, Italy. *Epilepsia*. 1990;31:27-32.

83. Couper J. Prevalence of childhood disability in rural KwaZulu-Natal. *S Afr Med J*. 2002;92:549-52.
84. Cruz ME, Schantz PM, Cruz I, et al. Epilepsy and neurocysticercosis in an Andean community. *Int J Epidemiol*. 1999;28:799-803.
85. Currie CJ, Morgan CL, Peters JR, et al. The demand for hospital services for patients with epilepsy. *Epilepsia*. 1998;39:537-44.
86. Das SK, Biswas A, Roy T, et al. A random sample survey for prevalence of major neurological disorders in Kolkata. *Indian J Med Res*. 2006;124:163-72.
87. Das SK, Biswas A, Roy J, et al. Prevalence of major neurological disorders among geriatric population in the metropolitan city of Kolkata. *J Assoc Physicians India*. 2008;56:175-81.
88. Debrock C, Preux PM, Houinato D, et al. Estimation of the prevalence of epilepsy in the Benin region of Zinvie using the capture-recapture method. *Int J Epidemiol*. 2000;29:330-5.
89. Del Brutto OH, Santibanez R, Idrovo L, et al. Epilepsy and neurocysticercosis in Atahualpa: a door-to-door survey in rural coastal Ecuador. *Epilepsia*. 2005;46:583-7.
90. Dent W, Helbok R, Matuja WB, et al. Prevalence of active epilepsy in a rural area in South Tanzania: a door-to-door survey. *Epilepsia*. 2005;46:1963-9.
91. Doerfer J, Wasser S. An epidemiologic study of febrile seizures and epilepsy in children. *Epilepsy Res*. 1987;1:149-51.
92. Druet-Cabanac, M. Bertocci, L, Preux, P. Onchocerciasis and epilepsy in the North West region of Central African Republic. *African Journal of Neurological Sciences*. 2002;17:37-8.
93. Dura-Trave T, Yoldi-Petri ME, Gallinas-Victoriano F. Incidence of epilepsies and epileptic syndromes among children in Navarre, Spain: 2002 through 2005. *J Child Neurol*. 2008;23:878-82.
94. Durkin MS, Davidson LL, Hasan ZM, et al. Estimates of the prevalence of childhood seizure disorders in communities where professional resources are scarce: results from Bangladesh, Jamaica and Pakistan. *Paediatr Perinat Epidemiol*. 1992;6:166-80.
95. Edwards T, Scott AG, Munyoki G, et al. Active convulsive epilepsy in a rural district of Kenya: a study of prevalence and possible risk factors. *Lancet Neurol*. 2008;7:50-6.

96. El Tallawy HN, Farghaly WM, Rageh TA, et al. Epidemiology of major neurological disorders project in Al Kharga district, New Valley, Egypt. *Neuroepidemiology*. 2010;35:291-7.
97. El Tallawy HNA, Farghaly WMA, Rageh TA, et al. Door-to-door survey of major neurological disorders (project) in Al Quseir City, Red Sea Governorate, Egypt. *Neuropsychiatric Disease and Treatment*. 2013;9:767-71.
98. El-Tallawy HN, Farghaly WMA, Shehata GA, et al. Epidemiology of epilepsy in New Valley Governorate, Al Kharga District, Egypt. *Epilepsy Research*. 2013;104:167-74.
99. Elliott JO, Moore JL, Lu B. Health status and behavioral risk factors among persons with epilepsy in Ohio based on the 2006 Behavioral Risk Factor Surveillance System. *Epilepsy Behav*. 2008;12:434-44.
100. Eltze CM, Chong WK, Cox T, et al. A population-based study of newly diagnosed epilepsy in infants. *Epilepsia*. 2013;54:437-45.
101. Endziniene M, Pauza V, Miseviciene I. Prevalence of childhood epilepsy in Kaunas, Lithuania. *Brain Dev*. 1997;19:379-87.
102. Eriksson KJ, Koivikko MJ. Prevalence, classification, and severity of epilepsy and epileptic syndromes in children. *Epilepsia*. 1997;38:1275-82.
103. Faught E, Richman J, Martin R, et al. Incidence and prevalence of epilepsy among older US Medicare beneficiaries. *Neurology*. 2012;78:448-53.
104. Ferguson PL, Chiprich J, Smith G, et al. Prevalence of self-reported epilepsy, health care access, and health behaviors among adults in South Carolina. *Epilepsy Behav*. 2008;13:529-34.
105. Fong GC, Mak W, Cheng TS, et al. A prevalence study of epilepsy in Hong Kong. *Hong Kong Med J*. 2003;9:252-7.
106. Fong GC, Kwan P, Hui AC, et al. An epidemiological study of epilepsy in Hong Kong SAR, China. *Seizure*. 2008;17:457-64.
107. Forsgren L. Prevalence of epilepsy in adults in northern Sweden. *Epilepsia*. 1992;33:450-8.
108. Freitag CM, May TW, Pfafflin M, et al. Incidence of epilepsies and epileptic syndromes in children and adolescents: a population-based prospective study in Germany. *Epilepsia*. 2001;42:979-85.

109. Fuller-Thomson E, Brennenstuhl S. The association between depression and epilepsy in a nationally representative sample. *Epilepsia*. 2009;50:1051-8.
110. Gaitatzis A, Carroll K, Majeed A, et al. The epidemiology of the comorbidity of epilepsy in the general population. *Epilepsia*. 2004;45:1613-22.
111. Gallitto G, Serra S, La Spina P, et al. Prevalence and characteristics of epilepsy in the Aeolian islands. *Epilepsia*. 2005;46:1828-35.
112. Garcia-Noval J, Moreno E, de Mata F, et al. An epidemiological study of epilepsy and epileptic seizures in two rural Guatemalan communities. *Ann Trop Med Parasitol*. 2001;95:167-75.
113. Gill GV, Scott B, Beeching NJ, et al. Enumeration of non-communicable disease in rural South Africa by electronic data linkage and capture-recapture techniques. *Trop Med Int Health*. 2001;6:435-41.
114. Gissler M, Hemminki E, Louhiala P, et al. Health registers as a feasible means of measuring health status in childhood--a 7-year follow-up of the 1987 Finnish birth cohort. *Paediatr Perinat Epidemiol*. 1998;12:437-55.
115. Goel D, Agarwal A, Dhanai JS, et al. Comprehensive rural epilepsy surveillance programme in Uttarakhand state of India. *Neurol India*. 2009;57:355-6.
116. Gomes Md Mda M, Zeitoune RG, Kropf LA, et al. A house-to-house survey of epileptic seizures in an urban community of Rio de Janeiro, Brazil. *Arq Neuropsiquiatr*. 2002;60:708-11.
117. Gracia F, de Lao SL, Castillo L, et al. Epidemiology of epilepsy in Guaymi Indians from Bocas del Toro Province, Republic of Panama. *Epilepsia*. 1990;31:718-23.
118. Guekht A, Hauser WA, Milchakova L, et al. The epidemiology of epilepsy in the Russian Federation. *Epilepsy Res*. 2010;92:209-18.
119. Hackett RJ, Hackett L, Bhakta P. The prevalence and associated factors of epilepsy in children in Calicut District, Kerala, India. *Acta Paediatr*. 1997;86:1257-60.
120. Heaney DC, Begley CE. Economic evaluation of epilepsy treatment: a review of the literature. *Epilepsia*. 2002;43 Suppl 4:10-6.
121. Hinnell C, Williams J, Metcalfe A, et al. Health status and health-related behaviors in epilepsy compared to other chronic conditions--a national population-based study. *Epilepsia*. 2010;51:853-61.
122. Houinato D, Yemadje LP, Glietho G, et al. Epidemiology of epilepsy in rural Benin: Prevalence, incidence, mortality, and follow-up. *Epilepsia*. 2013;54:757-63.

123. Hunter E, Rogathi J, Chigudu S, et al. Prevalence of active epilepsy in rural Tanzania: A large community-based survey in an adult population. *Seizure*. 2012;21:691-8.
124. Huseyinoglu N, Ozben S, Arhan E, et al. Prevalence and risk factors of epilepsy among school children in eastern Turkey. *Pediatric Neurology*. 2012;47:13-8.
125. Hussain SA, Haut SR, Lipton RB, et al. Incidence of epilepsy in a racially diverse, community-dwelling, elderly cohort: results from the Einstein aging study. *Epilepsy Res*. 2006;71:195-205.
126. JAMA. Prevalence of self-reported epilepsy--United States, 1986-1990. *MMWR Morb Mortal Wkly Rep*. 1994;43:810-1, 7-8.
127. Josipovic-Jelic Z, Sonicki Z, Soljan I, et al. Prevalence and socioeconomic aspects of epilepsy in the Croatian county of Sibenik-Knin: Community-based survey. *Epilepsy and Behavior*. 2011;20:686-90.
128. Kaamugisha J, Feksi AT. Determining the prevalence of epilepsy in the semi-urban population of Nakuru, Kenya, comparing two independent methods not apparently used before in epilepsy studies. *Neuroepidemiology*. 1988;7:115-21.
129. Kaiser C, Asaba G, Leichsenring M, et al. High incidence of epilepsy related to onchocerciasis in West Uganda. *Epilepsy Res*. 1998;30:247-51.
130. Karaagac N, Yeni SN, Senocak M, et al. Prevalence of epilepsy in Silivri, a rural area of Turkey. *Epilepsia*. 1999;40:637-42.
131. Karabiber H, Yakinci C, Durmaz Y, et al. Prevalence of epilepsy in 3637 children of primary school age in the Province of Malatya, Turkey. *J Trop Pediatr*. 2001;47:317-8.
132. Kelvin EA, Hesdorffer DC, Bagiella E, et al. Prevalence of self-reported epilepsy in a multiracial and multiethnic community in New York City. *Epilepsy Res*. 2007;77:141-50.
133. Khedr EM, Shawky OA, Ahmed MA, et al. A community based epidemiological study of epilepsy in Assiut Governorate/Egypt. *Epilepsy Research*. 2013;103:294-302.
134. Kimura MY, K.; Nanba, E.; Ieshima, A.; Narai, S.; Takeshita, K. Unprovoked Seizures and Epilepsies in Kurayoshi, Japan. *Journal of Epilepsy*. 1998;11:162-7.

135. Kobau R, Dilorio CA, Price PH, et al. Prevalence of epilepsy and health status of adults with epilepsy in Georgia and Tennessee: Behavioral Risk Factor Surveillance System, 2002. *Epilepsy Behav.* 2004;5:358-66.
136. Kobau R, Gilliam F, Thurman DJ. Prevalence of self-reported epilepsy or seizure disorder and its associations with self-reported depression and anxiety: results from the 2004 HealthStyles Survey. *Epilepsia.* 2006;47:1915-21.
137. Kobau R, Zahran H, Grant D, et al. Prevalence of active epilepsy and health-related quality of life among adults with self-reported epilepsy in California: California Health Interview Survey, 2003. *Epilepsia.* 2007;48:1904-13.
138. Kobau R, Zahran H, Thurman DJ, et al. Epilepsy surveillance among adults--19 States, Behavioral Risk Factor Surveillance System, 2005. *MMWR Surveill Summ.* 2008;57:1-20.
139. Kocak N, Turker T, Aydin I, et al. The prevalence of disorders causing disability in young adult males in Turkey between 2009-2011. *Pakistan Journal of Medical Sciences.* 2013;29.
140. Kochen S, Melcon MO. Prognosis of epilepsy in a community-based study: 8 years of follow-up in an Argentine community. *Acta Neurol Scand.* 2005;112:370-4.
141. Konda K, Ablah E, Konda KS, et al. Health behaviors and conditions of persons with epilepsy: a bivariate analysis of 2006 BRFSS data. *Epilepsy Behav.* 2009;16:120-7.
142. Kotsopoulos I, de Krom M, Kessels F, et al. Incidence of epilepsy and predictive factors of epileptic and non-epileptic seizures. *Seizure.* 2005;14:175-82.
143. Koul R, Razdan S, Motta A. Prevalence and pattern of epilepsy (Lath/Mirgi/Laran) in rural Kashmir, India. *Epilepsia.* 1988;29:116-22.
144. Kozyrskyj AL, Prasad AN. The burden of seizures in Manitoba children: a population-based study. *Can J Neurol Sci.* 2004;31:48-52.
145. Kruja J, Beghi E, Zerbi D, et al. High prevalence of major neurological disorders in two albanian communities: Results of a door-to-door survey. *Neuroepidemiology.* 2012;38:138-47.
146. Kumar R, Bhave A, Bhargava R, et al. Prevalence and risk factors for neurological disorders in children aged 6 months to 2 years in northern India. *Developmental Medicine and Child Neurology.* 2013;55:348-56.
147. Kun LN, Ling LW, Wah YW, et al. Epidemiologic study of epilepsy in young Singaporean men. *Epilepsia.* 1999;40:1384-7.



148. Kurth T, Lewis BE, Walker AM. Health care resource utilization in patients with active epilepsy. *Epilepsia*. 2010;51:874-82.
149. Larsson K, Eeg-Olofsson O. A population based study of epilepsy in children from a Swedish county. *Eur J Paediatr Neurol*. 2006;10:107-13.
150. Lavados J, Germain L, Morales A, et al. A descriptive study of epilepsy in the district of El Salvador, Chile, 1984-1988. *Acta Neurol Scand*. 1992;85:249-56.
151. Layne Moore J, Elliott JO, Lu B, et al. Serious psychological distress among persons with epilepsy based on the 2005 California Health Interview Survey. *Epilepsia*. 2009;50:1077-84.
152. Lee SY, Jung KY, Lee IK, et al. Prevalence of treated epilepsy in Korea based on national health insurance data. *Journal of Korean Medical Science*. 2012;27:285-90.
153. Linehan C, Kerr MP, Walsh PN, et al. Examining the prevalence of epilepsy and delivery of epilepsy care in Ireland. *Epilepsia*. 2010;51:845-52.
154. Lobo-Escolar A, Saz P, Marcos G, et al. Somatic and psychiatric comorbidity in the general elderly population: results from the ZARADEMP Project. *J Psychosom Res*. 2008;65:347-55.
155. Lomidze G, Kasradze S, Kvernadze D, et al. The prevalence and treatment gap of epilepsy in Tbilisi, Georgia. *Epilepsy Research*. 2012;98:123-9.
156. Lossius MI, Clench-Aas J, van Roy B, et al. Psychiatric symptoms in adolescents with epilepsy in junior high school in Norway: a population survey. *Epilepsy Behav*. 2006;9:286-92.
157. Luengo A, Parra J, Colas J, et al. Prevalence of epilepsy in northeast Madrid. *J Neurol*. 2001;248:762-7.
158. MacDonald BK, Cockerell OC, Sander JW, et al. The incidence and lifetime prevalence of neurological disorders in a prospective community-based study in the UK. *Brain*. 2000;123 ( Pt 4):665-76.
159. Magalov SI, Hasanov NF, Azizova NX, et al. The prevalence of epilepsy in the Nakhichevan Autonomous Republic of Azerbaijan. *CNS & Neurological Disorders Drug Targets*. 2012;11:102-9.
160. Mahmoud N. Prevalence of Epilepsy in Primary School Children in El-Minia City, Egypt. *Egypt J Neurol Psychiat Neurosurg*. 2009;46:33-9.

161. Mani KS, Rangan G, Srinivas HV, et al. The Yelandur study: a community-based approach to epilepsy in rural South India--epidemiological aspects. *Seizure*. 1998;7:281-8.
162. Maremmani C, Rossi G, Bonuccelli U, et al. Descriptive epidemiologic study of epilepsy syndromes in a district of northwest Tuscany, Italy. *Epilepsia*. 1991;32:294-8.
163. Martinez C, Sullivan T, Hauser WA. Prevalence of acute repetitive seizures (ARS) in the United Kingdom. *Epilepsy Res*. 2009;87:137-43.
164. Medina MT, Duron RM, Martinez L, et al. Prevalence, incidence, and etiology of epilepsies in rural Honduras: the Salama Study. *Epilepsia*. 2005;46:124-31.
165. Melcon MO, Kochen S, Vergara RH. Prevalence and clinical features of epilepsy in Argentina. A community-based study. *Neuroepidemiology*. 2007;28:8-15.
166. Mendizabal JE, Salguero LF. Prevalence of epilepsy in a rural community of Guatemala. *Epilepsia*. 1996;37:373-6.
167. MMWR. Detection of notifiable diseases through surveillance for imported plague--New York, September-October 1994. *MMWR Morb Mortal Wkly Rep*. 1994;43:805-7.
168. MMWR. Health-related quality of life among persons with epilepsy--Texas, 1998. *MMWR Morb Mortal Wkly Rep*. 2001;50:24-6, 35.
169. MMWR. Prevalence of epilepsy and health-related quality of life and disability among adults with epilepsy--South Carolina, 2003 and 2004. *MMWR Morb Mortal Wkly Rep*. 2005;54:1080-2.
170. Mohammadi MR, Ghanizadeh A, Davidian H, et al. Prevalence of epilepsy and comorbidity of psychiatric disorders in Iran. *Seizure*. 2006;15:476-82.
171. Morgan CL, Ahmed Z, Kerr MP. Social deprivation and prevalence of epilepsy and associated health usage. *J Neurol Neurosurg Psychiatry*. 2000;69:13-7.
172. Mung'ala-Odera V, Meehan R, Njuguna P, et al. Prevalence and risk factors of neurological disability and impairment in children living in rural Kenya. *Int J Epidemiol*. 2006;35:683-8.
173. Mung'ala-Odera V, White S, Meehan R, et al. Prevalence, incidence and risk factors of epilepsy in older children in rural Kenya. *Seizure*. 2008;17:396-404.

174. Munoz M, Boutros-Toni F, Preux PM, et al. Prevalence of neurological disorders in Haute-Vienne department (Limousin region-France). *Neuroepidemiology*. 1995;14:193-8.
175. Murphy CC, Trevathan E, Yeargin-Allsopp M. Prevalence of epilepsy and epileptic seizures in 10-year-old children: results from the Metropolitan Atlanta Developmental Disabilities Study. *Epilepsia*. 1995;36:866-72.
176. Nakashima K, Yokoyama Y, Shimoyama R, et al. Prevalence of neurological disorders in a Japanese town. *Neuroepidemiology*. 1996;15:208-13.
177. Ndoye NF, Sow AD, Diop AG, et al. Prevalence of epilepsy its treatment gap and knowledge, attitude and practice of its population in sub-urban Senegal an ILAE/IBE/WHO study. *Seizure*. 2005;14:106-11.
178. Ngugi AK, Bottomley C, Scott JAC, et al. Incidence of convulsive epilepsy in a rural area in Kenya. *Epilepsia*. 2013; 54:1352-59.
179. Ngugi AK, Bottomley C, Kleinschmidt I, et al. Prevalence of active convulsive epilepsy in sub-Saharan Africa and associated risk factors: cross-sectional and case-control studies. *Lancet neurology*. 2013;12:253-63.
180. Nicoletti A, Reggio A, Bartoloni A, et al. Prevalence of epilepsy in rural Bolivia: a door-to-door survey. *Neurology*. 1999;53:2064-9.
181. Nicoletti A, Bartoloni A, Sofia V, et al. Epilepsy and neurocysticercosis in rural Bolivia: a population-based survey. *Epilepsia*. 2005;46:1127-32.
182. Nitiema P, Carabin H, Hounton S, et al. Prevalence case-control study of epilepsy in three Burkina Faso villages. *Acta Neurologica Scandinavica*. 2012;126:270-8.
183. Njamnshi AS, V.; Djientcheu, V.; Ongolo-Zogo, P.; Mapoure, Y.; Yepnjo, F.; Echouffo, T.; Zebaze, R.; Meli, J. Risk factors associated with epilepsy in a rural area in cameroon: A preliminary study. *African Journal of Neurological Sciences*. 2007;26:18-26.
184. Noorbala AA, Bagheri Yazdi SA, Yasamy MT, et al. Mental health survey of the adult population in Iran. *Br J Psychiatry*. 2004;184:70-3.
185. Noronha AL, Borges MA, Marques LH, et al. Prevalence and pattern of epilepsy treatment in different socioeconomic classes in Brazil. *Epilepsia*. 2007;48:880-5.
186. Nwani PO, Nwosu MC, Enwereji KO, et al. Epilepsy treatment gap: Prevalence and associated factors in Southeast Nigeria. *Acta Neurologica Scandinavica*. 2013;128:83-90.

187. Oka E, Ohtsuka Y, Yoshinaga H, et al. Prevalence of childhood epilepsy and distribution of epileptic syndromes: a population-based survey in Okayama, Japan. *Epilepsia*. 2006;47:626-30.
188. Okan N, Okan M, Eralp O, et al. The prevalence of neurological disorders among children in Gemlik (Turkey). *Dev Med Child Neurol*. 1995;37:597-603.
189. Olafsson E, Hauser WA, Ludvigsson P, et al. Incidence of epilepsy in rural Iceland: a population-based study. *Epilepsia*. 1996;37:951-5.
190. Olafsson E, Hauser WA. Prevalence of epilepsy in rural Iceland: A population-based study. *Epilepsia*. 1999;40:1529-34.
191. Olafsson E, Ludvigsson P, Gudmundsson G, et al. Incidence of unprovoked seizures and epilepsy in Iceland and assessment of the epilepsy syndrome classification: a prospective study. *Lancet Neurol*. 2005;4:627-34.
192. Onal AE, Tumerdem Y, Ozturk MK, et al. Epilepsy prevalence in a rural area in Istanbul. *Seizure*. 2002;11:397-401.
193. Oun A, Haldre S, Magi M. Prevalence of adult epilepsy in Estonia. *Acta Neurol Scand*. 2003;108:245-51.
194. Oun A, Haldre S, Magi M. Incidence of adult epilepsy in Estonia. *Acta Neurol Scand*. 2003;108:245-51.
195. Parko K, Thurman DJ. Prevalence of epilepsy and seizures in the Navajo Nation 1998-2002. *Epilepsia*. 2009;50:2180-5.
196. Pavlovic M, Jarebinski M, Pekmezovic T, et al. Seizure disorders in preschool children in a Serbian district. *Neuroepidemiology*. 1998;17:105-10.
197. Picot MC, Baldy-Moulinier M, Daures JP, et al. The prevalence of epilepsy and pharmacoresistant epilepsy in adults: a population-based study in a Western European country. *Epilepsia*. 2008;49:1230-8.
198. Placencia M, Shorvon SD, Paredes V, et al. Epileptic seizures in an Andean region of Ecuador. Incidence and prevalence and regional variation. *Brain*. 1992;115 ( Pt 3):771-82.
199. Placencia M, Sander JW, Roman M, et al. The characteristics of epilepsy in a largely untreated population in rural Ecuador. *J Neurol Neurosurg Psychiatry*. 1994;57:320-5.

200. Pollak L, Morad Y, Dabby R, et al. Prevalence of central nervous system diseases--a large retrospective cohort study of adolescents. *Neuropediatrics*. 2009;40:275-9.
201. Prasad AN, Sang X, Corbett BA, et al. Prevalence of childhood epilepsy in Canada. *The Canadian journal of neurological sciences*. 2011;Le journal canadien des sciences neurologiques. 38:719-22.
202. Preux PM, Chea K, Chamroeun H, et al. First-ever, door-to-door cross-sectional representative study in Prey Veng province (Cambodia). *Epilepsia*. 2011;52:1382-7.
203. Prischich F, De Rinaldis M, Bruno F, et al. High prevalence of epilepsy in a village in the Littoral Province of Cameroon. *Epilepsy Res*. 2008;82:200-10.
204. Puvanendran K. Epidemiology of epilepsy in Singapore. *Ann Acad Med Singapore*. 1993;22:489-92.
205. Radhakrishnan K, Pandian JD, Santhoshkumar T, et al. Prevalence, knowledge, attitude, and practice of epilepsy in Kerala, South India. *Epilepsia*. 2000;41:1027-35.
206. Raina SK, Razdan S, Nanda R. Prevalence of neurological disorders in children less than 10 years of age in RS Pura town of Jammu and Kashmir. *Journal of Pediatric Neurosciences*. 2011;6:103-5.
207. Razdan S, Kaul RL, Motta A, et al. Prevalence and pattern of major neurological disorders in rural Kashmir (India) in 1986. *Neuroepidemiology*. 1994;13:113-9.
208. Rocca WA, Savettieri G, Anderson DW, et al. Door-to-door prevalence survey of epilepsy in three Sicilian municipalities. *Neuroepidemiology*. 2001;20:237-41.
209. Russ SA, Larson K, Halfon N. A national profile of childhood epilepsy and seizure disorder. *Pediatrics*. 2012;129:256-64.
210. Rwiza HT, Kilonzo GP, Haule J, et al. Prevalence and incidence of epilepsy in Ulanga, a rural Tanzanian district: a community-based study. *Epilepsia*. 1992;33:1051-6.
211. Rwiza HT. The Muhimbili epilepsy project, a three pronged approach. Assessment of the size of the problem, organization of an epilepsy care system and research on risk factors. *Trop Geogr Med*. 1994;46:S22-4.
212. Saha SP, Bhattacharya S, Das SK, et al. Epidemiological study of neurological disorders in a rural population of Eastern India. *J Indian Med Assoc*. 2003;101:299-300, 2-4.

213. Saha SPB, S.; Roy, B.; Basu, A.; Roy, T.; Maity, B.; Das, S. A prospective incidence study of epilepsy in a rural community of West-Bengal, India. *Neurology Asia*. 2008;13:41-8.
214. Sahin AB, E.; Sumer, H.; Tas, A.; Mollaoglu, M.; Dener, S. Epidemiologic evaluation of epileptic and nonepileptic seizures in Sivas region of middle Anatolia. *Neurology Psychiatry and Brain Research*. 2004;11:97-102.
215. Sampaio LP, Caboclo LO, Kuramoto K, et al. Prevalence of epilepsy in children from a Brazilian area of high deprivation. *Pediatr Neurol*. 2010;42:111-7.
216. Sangrador C, Palencia Luaces R. Study of the prevalence of epilepsy among schoolchildren in Valladolid, Spain. *Epilepsia*. 1991;32:791-7.
217. Sauvey S, Osrin D, Manandhar DS, et al. Prevalence of childhood and adolescent disabilities in rural Nepal. *Indian Pediatr*. 2005;42:697-702.
218. Schiariti V, Farrell K, Hoube JS, et al. Period prevalence of epilepsy in children in BC: a population-based study. *Can J Neurol Sci*. 2009;36:36-41.
219. Serdaroglu A, Ozkan S, Aydin K, et al. Prevalence of epilepsy in Turkish children between the ages of 0 and 16 years. *J Child Neurol*. 2004;19:271-4.
220. Shackleton DP, Westendorp RG, Kasteleijn-Nolst Trenite DG, et al. Dispensing epilepsy medication: a method of determining the frequency of symptomatic individuals with seizures. *J Clin Epidemiol*. 1997;50:1061-8.
221. Shah PA, Shapoo SF, Koul RK, et al. Prevalence of epilepsy in school-going children (6-18 years) in Kashmir Valley of North-west India. *J Indian Med Assoc*. 2009;107:216-8.
222. Hu J, Si Y, Liu L, et al. Prevalence and treatment gap of active convulsive epilepsy: A large community-based survey in rural west China. *Seizure: European Journal of Epilepsy*. 2014;23:333-7.
223. Sidenvall R, Forsgren L, Heijbel J. Prevalence and characteristics of epilepsy in children in northern Sweden. *Seizure*. 1996;5:139-46.
224. Sillanpaa M, Kalviainen R, Klaukka T, et al. Temporal changes in the incidence of epilepsy in Finland: nationwide study. *Epilepsy Res*. 2006;71:206-15.
225. Sillanpaa M, Lastunen S, Helenius H, et al. Regional differences and secular trends in the incidence of epilepsy in Finland: A nationwide 23-year registry study. *Epilepsia*. 2011;52:1857-67.

226. Simms V, Atijosan O, Kuper H, et al. Prevalence of epilepsy in Rwanda: a national cross-sectional survey. *Trop Med Int Health*. 2008;13:1047-53.
227. Singh A, Kaur A. Epilepsy in rural Haryana--prevalence and treatment seeking behaviour. *J Indian Med Assoc*. 1997;95:37-9, 47.
228. Snow RW, Williams RE, Rogers JE, et al. The prevalence of epilepsy among a rural Kenyan population. Its association with premature mortality. *Trop Geogr Med*. 1994;46:175-9.
229. Somoza MJ, Forlenza RH, Brussino M, et al. Epidemiological survey of epilepsy in the primary school population in Buenos Aires. *Neuroepidemiology*. 2005;25:62-8.
230. Stranjalis G, Tsamandouraki K, Gazonis S, et al. Low occurrence of epileptic seizures and epilepsy in a defined area of Northwest Greece. *Seizure*. 2009;18:206-10.
231. Su CC, S.; Chen, Z.; Lee, C.; Chen, R. Neuroepidemiological survey in Ilan Taiwan, (NESIT): (4) Prevalence of epilepsy. *Acta Neurologica Taiwanica*. 1998;7:75-84.
232. Sureka RK, Sureka R. Prevalence of epilepsy in rural Rajasthan--a door-to-door survey. *J Assoc Physicians India*. 2007;55:741-2.
233. Svendsen T, Lossius M, Nakken KO. Age-specific prevalence of epilepsy in Oppland County, Norway. *Acta Neurol Scand*. 2007;116:307-11.
234. Swiderska N, Gondwe J, Joseph J, et al. The prevalence and management of epilepsy in secondary school pupils with and without special educational needs. *Child: care, health and development*. 2011;37:96-102.
235. Talaat FE-R, M.; Atef, M.; Shaker, E.; Mohammed, H. Prevalence of Epilepsy in School Children in El-Manyal Island. *Egyptian Journal of Neurology, Psychiatry and Neurosurgery*. 2009;46:19-32.
236. Tallis R, Hall G, Craig I, et al. How common are epileptic seizures in old age? *Age Ageing*. 1991;20:442-8.
237. Tamrat G, Kebede Y, Alemu S, et al. The prevalence and characteristics of physical and sensory disabilities in Northern Ethiopia. *Disabil Rehabil*. 2001;23:799-804.
238. Tang YL, G.; Ma, G.; Wang, D. Epidemiological survey of epilepsy in Dongning country, a rural area in Heilongjiang Province of China. *Chinese Journal of Clinical Rehabilitation*. 2004;8:770-1.

239. Tekle-Haimanot R, Abebe M, Gebre-Mariam A, et al. Community-based study of neurological disorders in rural central Ethiopia. *Neuroepidemiology*. 1990;9:263-77.
240. Tekle-Haimanot R, Forsgren L, Abebe M, et al. Clinical and electroencephalographic characteristics of epilepsy in rural Ethiopia: a community-based study. *Epilepsy Res*. 1990;7:230-9.
241. Tellez-Zenteno JF, Pondal-Sordo M, Matijevic S, et al. National and regional prevalence of self-reported epilepsy in Canada. *Epilepsia*. 2004;45:1623-9.
242. Tellez-Zenteno JF, Matijevic S, Wiebe S. Somatic comorbidity of epilepsy in the general population in Canada. *Epilepsia*. 2005;46:1955-62.
243. Tellez-Zenteno JF, Patten SB, Jette N, et al. Psychiatric comorbidity in epilepsy: a population-based analysis. *Epilepsia*. 2007;48:2336-44.
244. Tidman L, Saravanan K, Gibbs J. Epilepsy in mainstream and special educational primary school settings. *Seizure*. 2003;12:47-51.
245. Topbas M, Ozgun S, Sonmez MF, et al. Epilepsy prevalence in the 0-17 age group in Trabzon, Turkey. *Iranian Journal of Pediatrics*. 2012;22:344-50.
246. Tran DS, Odermatt P, Le TO, et al. Prevalence of epilepsy in a rural district of central Lao PDR. *Neuroepidemiology*. 2006;26:199-206.
247. Tuan NA, Cuong le Q, Allebeck P, et al. The prevalence of epilepsy in a rural district of Vietnam: a population-based study from the EPIBAVI project. *Epilepsia*. 2008;49:1634-7.
248. Velez A, Eslava-Cobos J. Epilepsy in Colombia: epidemiologic profile and classification of epileptic seizures and syndromes. *Epilepsia*. 2006;47:193-201.
249. Velioglu SK, Bakirdemir M, Can G, et al. Prevalence of epilepsy in northeast Turkey. *Epileptic Disord*. 2010;12:22-37.
250. Villaran MV, Montano SM, Gonzalvez G, et al. Epilepsy and neurocysticercosis: an incidence study in a Peruvian rural population. *Neuroepidemiology*. 2009;33:25-31.
251. Waaler PE, Blom BH, Skeidsvoll H, et al. Prevalence, classification, and severity of epilepsy in children in western Norway. *Epilepsia*. 2000;41:802-10.
252. Wallace H, Shorvon S, Tallis R. Age-specific incidence and prevalence rates of treated epilepsy in an unselected population of 2052922 and age-specific fertility rates of women with epilepsy. *Lancet*. 1998;352:1970-3.



253. Wang WZ, Wu JZ, Wang DS, et al. The prevalence and treatment gap in epilepsy in China: an ILAE/IBE/WHO study. *Neurology*. 2003;60:1544-5.
254. Wang W, Wu J, Dai X, et al. Global campaign against epilepsy: assessment of a demonstration project in rural China. *Bull World Health Organ*. 2008;86:964-9.
255. Wiebe S, Bellhouse DR, Fallahay C, et al. Burden of epilepsy: the Ontario Health Survey. *Can J Neurol Sci*. 1999;26:263-70.
256. Winkler AS, Kerschbaumsteiner K, Stelzhammer B, et al. Prevalence, incidence, and clinical characteristics of epilepsy--a community-based door-to-door study in northern Tanzania. *Epilepsia*. 2009;50:2310-3.
257. Wirrell EC, Grossardt BR, Wong-Kisiel LCL, et al. Incidence and classification of new-onset epilepsy and epilepsy syndromes in children in Olmsted County, Minnesota from 1980 to 2004: A population-based study. *Epilepsy Research*. 2011;95:110-8.
258. Wong V. Study of seizure and epilepsy in Chinese children in Hong Kong: period prevalence and patterns. *J Child Neurol*. 2004;19:19-25.
259. Wright J, Pickard N, Whitfield A, et al. A population-based study of the prevalence, clinical characteristics and effect of ethnicity in epilepsy. *Seizure*. 2000;9:309-13.
260. Yemadje LP, Houinato D, Boumediene F, et al. Prevalence of epilepsy in the 15 years and older in Benin: A door-to-door nationwide survey. *Epilepsy Research*. 2012;99:318-26.
261. Zaid AA-H, T.; Shorer, Z.; Grotto, I.; Mahajinahm, M. Prevalence of epilepsy in Bedouin children: A cross-sectional study in Southern Israel. *Journal of Pediatric Neurology*. 2008;6:139-43.
262. Zhao Y, Zhang Q, Tsering T, et al. Prevalence of convulsive epilepsy and health-related quality of life of the population with convulsive epilepsy in rural areas of Tibet Autonomous Region in China: an initial survey. *Epilepsy Behav*. 2008;12:373-81.
