# Supplementary material
Source: PubMed Central journal article supplement (PMC5272794)
Supplement: supp_WNL.0000000000003509_figure_e1.pdf [file supp_WNL.0000000000003509_figure_e1.pdf]

Figure e-1. Active Point Prevalence of Epilepsy

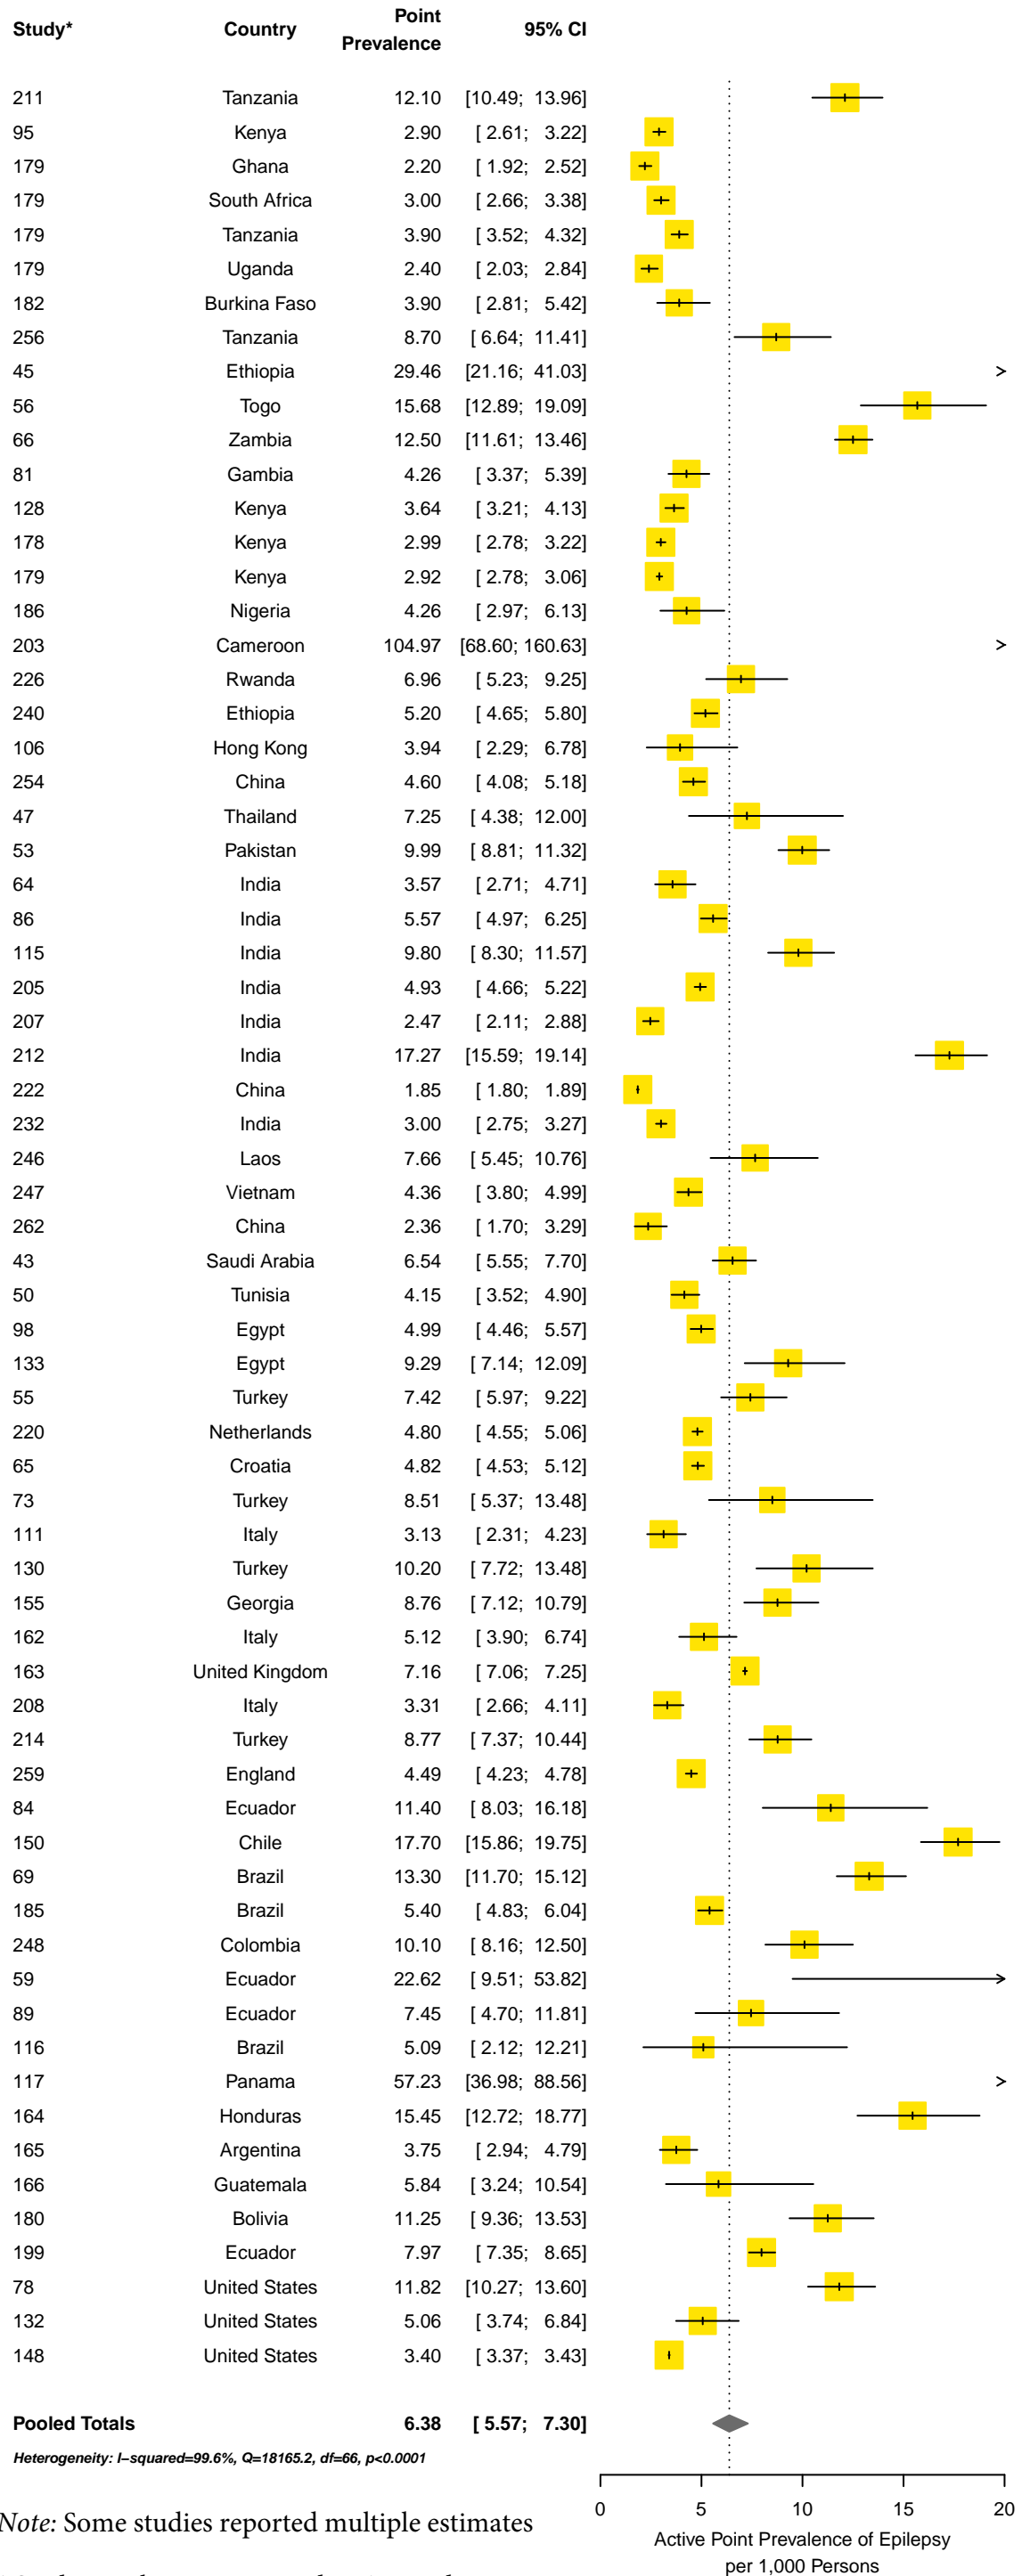

Note: Some studies reported multiple estimates

\* Study numbers correspond to Appendix e-3
