# Supplementary material
Source: PubMed Central journal article supplement (PMC5272794)
Supplement: supp_WNL.0000000000003509_figure_e8.pdf [file supp_WNL.0000000000003509_figure_e8.pdf]

Figure e-8. Incidence Rate of Epilepsy by Country Income Level

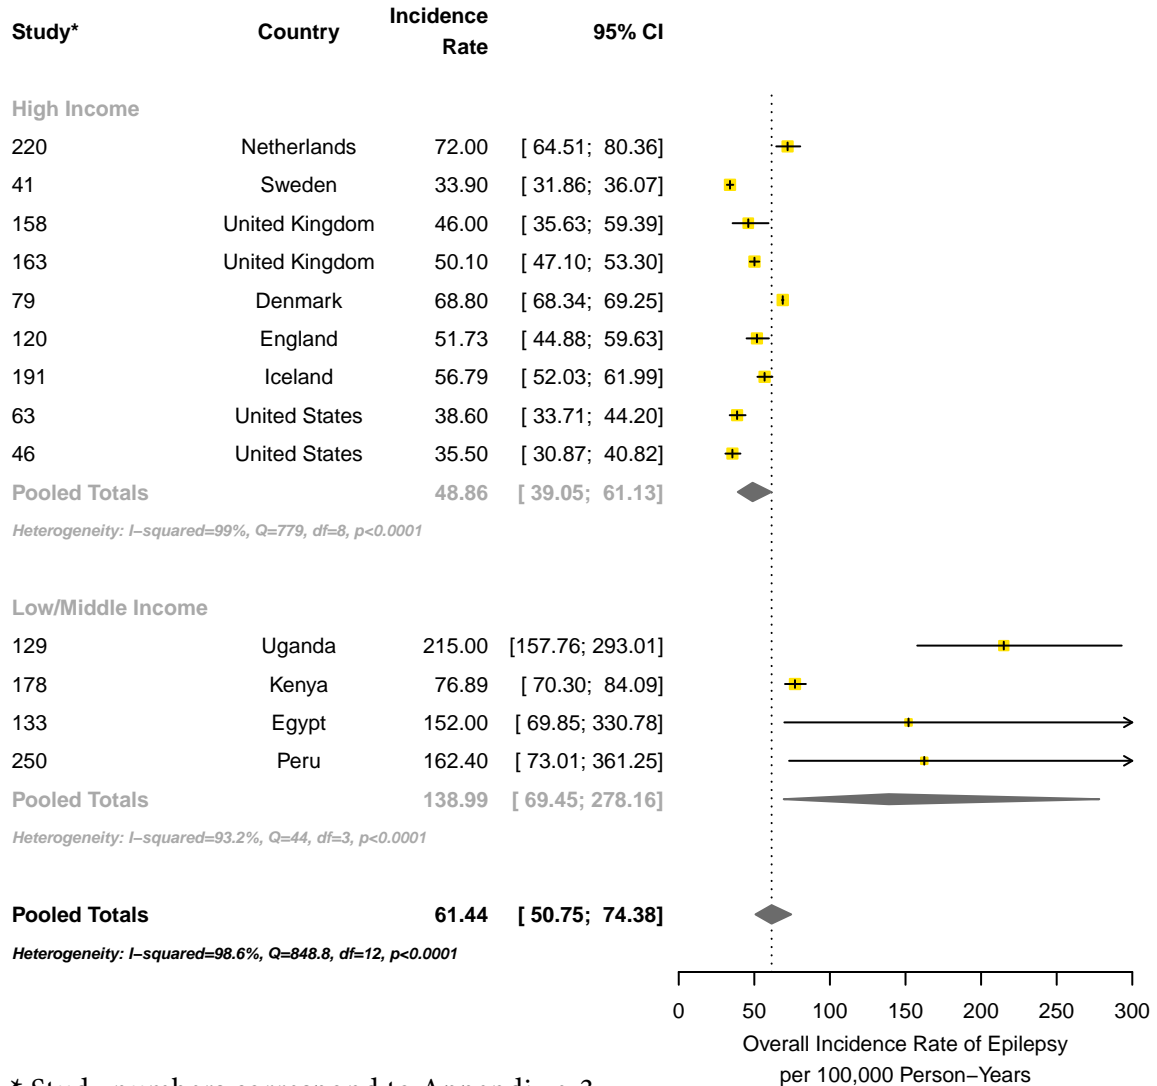

\* Study numbers correspond to Appendix e-3
