# Supplementary material
Source: PubMed Central journal article supplement (PMC5272794)
Supplement: supp_WNL.0000000000003509_table_e1.pdf [file supp_WNL.0000000000003509_table_e1.pdf]

Table e-1. Characteristics of Included Studies

| <b>Study</b>         | <b>Continent, Country</b>                    | <b>Region/<br/>Subpopulation</b>                       | <b>Age Groups<br/>Studied</b>         | <b>Data Sources</b>                                                    | <b>Diagnosed By</b>                            | <b>Prevalence per<br/>1,000</b> |
|----------------------|----------------------------------------------|--------------------------------------------------------|---------------------------------------|------------------------------------------------------------------------|------------------------------------------------|---------------------------------|
| Avode (2003)         | <b>Africa</b><br>Benin                       | Cotonou<br>Administrative<br>Zone                      | Children /<br>Adolescents /<br>Adults | Sampled From Schools In<br>The Region                                  | Unable to Determine                            | Active: 7.86                    |
| Debrock (2000)       | <b>Africa</b><br>Benin                       | Yevié and Zinvié-<br>Zoumé villages                    | Unknown                               | Door To Door / Hospital<br>Clinic Review / Key<br>Informant Interviews | Health Professional /<br>Chart Review          | Lifetime: 21.10                 |
| Houinato (2013)      | <b>Africa</b><br>Benin                       | Djidja community,<br>Zou region                        | All                                   | Door To Door                                                           | Health Professional                            | Lifetime: 10.50                 |
| Yemadje (2012)       | <b>Africa</b><br>Benin                       | 12 regions,<br>national sample                         | Adolescents /<br>Adults /<br>Elderly  | Door To Door                                                           | Health Professional                            | Active: 8.05                    |
| Nitiema (2012)       | <b>Africa</b><br>Burkina Faso                | Batondo,<br>Nyonyogo, and<br>Pabré villages            | All                                   | Door To Door                                                           | Health Professional                            | Active: 3.90<br>Lifetime: 4.50  |
| Njamnshi (2007)      | <b>Africa</b><br>Cameroon                    | Bilomo village,<br>Centre Province                     | Unknown                               | Door To Door                                                           | Health Professional /<br>Self-report           | Lifetime: 49.00                 |
| Prischich (2008)     | <b>Africa</b><br>Cameroon                    | Kélong village,<br>Sanaga Valley,<br>Littoral Province | All                                   | Door To Door                                                           | Health Professional /<br>EEG                   | Active: 104.97                  |
| Druet-Cabanac (1998) | <b>Africa</b><br>Central African<br>Republic | 40 villages,<br>Ngaoundaye sub-<br>prefecture          | Unknown                               | Unable To Determine                                                    | Unable to Determine                            | Lifetime: 7.80                  |
| El Tallawy (2010)    | <b>Africa</b><br>Egypt                       | Al Kharga district,<br>New Valley<br>governorate       | All                                   | Door To Door                                                           | Health Professional                            | Lifetime: 6.98                  |
| El Tallawy (2013)    | <b>Africa</b><br>Egypt                       | Al Kharga district,<br>New Valley<br>governorate       | All                                   | Door To Door / Hospital<br>Clinic Review                               | Health Professional /<br>Imaging               | Active: 4.99<br>Lifetime: 6.76  |
| El Tallawy (2013)    | <b>Africa</b><br>Egypt                       | Al Quseir City, Red<br>Sea governorate                 | All                                   | Door To Door                                                           | Health Professional /<br>Questionnaire         | Lifetime: 5.50                  |
| Khedr (2013)         | <b>Africa</b><br>Egypt                       | Assiut governorate                                     | All                                   | Door To Door                                                           | Health Professional /<br>Self-report / Imaging | Active: 9.29<br>Lifetime: 12.67 |
| Mahmoud (2009)       | <b>Africa</b><br>Egypt                       | El-Minia City, El-<br>Minia governorate                | Children                              | School Survey                                                          | Health Professional /<br>Self-report / EEG     | Lifetime: 7.20                  |
| Talaat (2009)        | <b>Africa</b><br>Egypt                       | El Manyal Island,<br>Cairo                             | Children /<br>Adolescents             | School Survey                                                          | Health Professional /<br>Chart Review / EEG    | Lifetime: 4.35                  |
| Almu (2006)          | <b>Africa</b><br>Ethiopia                    | Zay Society,<br>Ethiopian Rift<br>Valley               | All                                   | Door To Door                                                           | Health Professional                            | Active: 29.46                   |

|                                    |                           |                                                                                                           |          |                         |                                         |                                            |
|------------------------------------|---------------------------|-----------------------------------------------------------------------------------------------------------|----------|-------------------------|-----------------------------------------|--------------------------------------------|
| Tamrat (2001)                      | <b>Africa</b><br>Ethiopia | Dabat, Northern Ethiopia                                                                                  | All      | Door To Door            | Health Professional / Self-report       | Lifetime: 7.12                             |
| Tekle-Haimanot <sup>a</sup> (1990) | <b>Africa</b><br>Ethiopia | Meskan and Mareko rural subdistrict, Haykoch and Butajira district, central Administrative region of Shoa | All      | Door To Door            | Health Professional / Self-report / EEG | Active: 5.20                               |
| Tekle-Haimanot <sup>a</sup> (1990) | <b>Africa</b><br>Ethiopia | Meskan and Mareko rural subdistrict, Haykoch and Butajira district, central Administrative region of Shoa | All      | Door To Door            | Health Professional / Self-report / EEG | Active: 5.20                               |
| Coleman (2002)                     | <b>Africa</b><br>Gambia   | 40 villages around town of Farafenni                                                                      | All      | Unable To Determine     | Health Professional / Self-report       | Active: 4.26<br>Lifetime: 4.94             |
| Ngugi (2013) <sup>m</sup>          | <b>Africa</b><br>Ghana    | Kintampo                                                                                                  | All      | Door To Door            | Health Professional / Chart Review      | Active: 2.20                               |
| Edwards (2008)                     | <b>Africa</b><br>Kenya    | Kilifi district                                                                                           | All      | Door To Door            | Health Professional / Self-report       | Active: 2.90                               |
| Kaamugisha (1988)                  | <b>Africa</b><br>Kenya    | Nakuru municipality                                                                                       | All      | Random Cluster Sampling | Health Professional / Self-report       | Active: 3.64                               |
| Mungala-Odera <sup>b</sup> (2006)  | <b>Africa</b><br>Kenya    | Kilifi district                                                                                           | Children | Unable To Determine     | Health Professional                     | Lifetime: 41.00                            |
| Mungala-Odera <sup>b</sup> (2008)  | <b>Africa</b><br>Kenya    | Kilifi district                                                                                           | Children | Unable To Determine     | Health Professional                     | Active: 11.00<br>Lifetime: 41.00           |
| Ngugi (2013) <sup>m</sup>          | <b>Africa</b><br>Kenya    | Kilifi                                                                                                    | All      | Door To Door            | Health Professional / Chart Review      | Active: 2.92                               |
| Ngugi (2013)                       | <b>Africa</b><br>Kenya    | Kilifi                                                                                                    | All      | Door To Door            | Health Professional / Chart Review      | Active: 2.96 (2003)<br>Active: 2.99 (2008) |
| Snow (1994)                        | <b>Africa</b><br>Kenya    | Kilifi district                                                                                           | All      | Door To Door / Census   | Self-report                             | Lifetime: 4.03                             |
| Nwani (2013)                       | <b>Africa</b><br>Nigeria  | Ukpo, Anambra State                                                                                       | All      | Door To Door            | Health Professional / Chart Review      | Active: 4.26                               |
| Simms (2008)                       | <b>Africa</b><br>Rwanda   | National Sample from census                                                                               | All      | Door To Door            | Health Professional / Self-report       | Active: 6.96                               |
| Ndoye (2005)                       | <b>Africa</b><br>Senegal  | Pikine Health District                                                                                    | All      | Door To Door            | Health Professional / Self-report / EEG | Lifetime: 14.20                            |

|                                    |                               |                                                                    |                                |                                             |                                            |                                  |
|------------------------------------|-------------------------------|--------------------------------------------------------------------|--------------------------------|---------------------------------------------|--------------------------------------------|----------------------------------|
| Christianson (2000)                | <b>Africa</b><br>South Africa | 8 villages in Bushbuckridge, Northern Province                     | Children                       | Door To Door                                | Health Professional / Self-report          | Active: 6.72<br>Lifetime: 7.32   |
| Couper (2002)                      | <b>Africa</b><br>South Africa | Manguzi subdistrict, Jozini-Uthungulu district, Kwazulu Natal      | Children                       | Door To Door                                | Health Professional / Self-report          | Lifetime: 9.00                   |
| Gill (2001)                        | <b>Africa</b><br>South Africa | Hlabisa district, Kwazulu Natal                                    | Unknown                        | Hospital Clinic Review                      | Chart Review                               | Lifetime: 1.96                   |
| Ngugi (2013) <sup>m</sup>          | <b>Africa</b><br>South Africa | Agincourt                                                          | All                            | Door To Door                                | Health Professional / Chart Review         | Active: 3.00                     |
| Bondestam (1990)                   | <b>Africa</b><br>Tanzania     | Zanzibar                                                           | All                            | Unable To Determine                         | Health Professional / Self-report          | Lifetime: 4.92                   |
| Dent (2005)                        | <b>Africa</b><br>Tanzania     | Mnero, Kitandi, Miembeni, and Ruvumu villages, Nachingwea district | All                            | Door To Door                                | Health Professional / Self-report          | Active: 8.60                     |
| Hunter (2012)                      | <b>Africa</b><br>Tanzania     | Hai district, Northeast Tanzania                                   | Adolescents / Adults / Elderly | Door To Door                                | Health Professional / Imaging              | Active: 2.82                     |
| Ngugi (2013) <sup>m</sup>          | <b>Africa</b><br>Tanzania     | Ifakara                                                            | All                            | Door To Door                                | Health Professional / Chart Review         | Active: 3.90                     |
| Rwiza (1992) <sup>c</sup>          | <b>Africa</b><br>Tanzania     | Ulanga district                                                    | All                            | Door To Door                                | Health Professional / Self-report          | Active: 12.10<br>Lifetime: 11.38 |
| Rwiza (1994) <sup>c</sup>          | <b>Africa</b><br>Tanzania     | Ulanga district                                                    | All                            | Door To Door                                | Health Professional / Self-report          | Active: 12.10<br>Lifetime: 11.38 |
| Winkler (2009)                     | <b>Africa</b><br>Tanzania     | Haydom, Northern Tanzania                                          | All                            | Door To Door                                | Health Professional / Self-report          | Active: 8.70<br>Lifetime: 11.20  |
| Balogou (2007)                     | <b>Africa</b><br>Togo         | Batamariba district                                                | All                            | Door To Door                                | Health Professional / EEG                  | Active: 15.68                    |
| Attia-Romdhane <sup>d</sup> (1993) | <b>Africa</b><br>Tunisia      | Kelibia                                                            | All                            | Door To Door                                | Health Professional                        | Active: 4.15                     |
| Attia Romdhane <sup>d</sup> (1993) | <b>Africa</b><br>Tunisia      | Kelibia                                                            | All                            | Door To Door                                | Health Professional                        | Active: 4.15                     |
| Ngugi (2013) <sup>m</sup>          | <b>Africa</b><br>Uganda       | Iganga-Mayuge                                                      | All                            | Door To Door                                | Health Professional / Chart Review         | Active: 2.40                     |
| Birbeck (2004)                     | <b>Africa</b><br>Zambia       | Chikankata catchment area                                          | All                            | Door To Door                                | Self-report                                | Active: 12.50                    |
| Magalov (2012)                     | <b>Asia</b><br>Azerbaijan     | Nakhichevan Autonomous Republic                                    | All                            | Door To Door                                | Health Professional / Chart Review / Other | Lifetime: 9.02                   |
| Durkin (1992) <sup>o</sup>         | <b>Asia</b><br>Bangladesh     | 3 rural and 2 urban areas                                          | Children                       | Convenience Sample Of Rural And Urban Zones | Health Professional / Self-report          | Active: 5.80<br>Lifetime: 6.50   |

|                          |                          |                                                                       |                                  |                                 |                                     |                                                                                |
|--------------------------|--------------------------|-----------------------------------------------------------------------|----------------------------------|---------------------------------|-------------------------------------|--------------------------------------------------------------------------------|
| Preux (2011)             | <b>Asia</b><br>Cambodia  | Prey Veng Province                                                    | All                              | Door To Door                    | Health Professional                 | Lifetime: 5.81                                                                 |
| Si (2013)                | <b>Asia</b><br>China     | 6 rural areas in West China                                           | All                              | Hospital Clinic Review / Survey | Health Professional                 | Active: 1.85                                                                   |
| Tang (2004)              | <b>Asia</b><br>China     | Heilongjiang Province                                                 | All                              | Door To Door                    | Health Professional / Self-report   | Lifetime: 7.98                                                                 |
| Wang (2003) <sup>e</sup> | <b>Asia</b><br>China     | Heilongjiang, Ningxia, Henan, Shanxi, and Jiangsu Provinces           | Unknown                          | Door To Door                    | Health Professional/ Self-report    | Active: 4.60<br>Lifetime: 7.00                                                 |
| Wang (2008) <sup>e</sup> | <b>Asia</b><br>China     | Heilongjiang, Ningxia, Henan, Shanxi, and Jiangsu Provinces; Shanghai | Unknown                          | Door To Door                    | Health Professional / Self-report   | Active: 4.60<br>Lifetime: 7.00 (2000)<br>Active: 4.50<br>Lifetime: 6.20 (2004) |
| Zhao (2008)              | <b>Asia</b><br>China     | Tibet Autonomous Region                                               | All                              | Door To Door                    | Health Professional / Self-report   | Active: 2.36<br>Lifetime: 2.50                                                 |
| Fong (2003)              | <b>Asia</b><br>Hong Kong | Hong Kong West region                                                 | Adults / Elderly                 | Hospital Clinic Review          | Health Professional / EEG           | Active: 1.54                                                                   |
| Fong (2008)              | <b>Asia</b><br>Hong Kong | Hong Kong Special Administrative Region                               | All                              | Telephone Survey                | Health Professional                 | Active: 3.94                                                                   |
| Wong (2004)              | <b>Asia</b><br>Hong Kong | Queen Mary Hospital                                                   | Infants / Children / Adolescents | Hospital Clinic Review          | Health Professional / Chart Review  | Active: 4.30                                                                   |
| Banerjee (2009)          | <b>Asia</b><br>India     | Kolkata                                                               | Children / Adolescents           | Door To Door                    | Health Professional / Self-report   | Active: 7.01                                                                   |
| Bharucha (1988)          | <b>Asia</b><br>India     | Parsi community of Mumbai                                             | All                              | Door To Door                    | Health Professional                 | Lifetime: 4.71<br>Active: 3.57                                                 |
| Das (2008)               | <b>Asia</b><br>India     | Kolkata                                                               | Adults / Elderly                 | Door To Door                    | Health Professional / Self-report   | Active: 2.57                                                                   |
| Das (2006)               | <b>Asia</b><br>India     | Kolkata                                                               | All                              | Door To Door                    | Health Professional / Self-report   | Active: 5.57<br>Lifetime: 6.11                                                 |
| Goel (2009)              | <b>Asia</b><br>India     | Chakrata block, Dehradun district, Uttarakhand state                  | Unknown                          | Door To Door                    | Health Professional / Imaging / EEG | Active: 9.80<br>Lifetime: 10.01                                                |
| Hackett (1997)           | <b>Asia</b><br>India     | Calicut district, Kerala                                              | Children                         | Door To Door                    | Health Professional / Self-report   | Active: 22.18                                                                  |
| Koul (1988) <sup>f</sup> | <b>Asia</b><br>India     | Kuthar Valley, South Kashmir, Northwest India                         | All                              | Door To Door                    | Health Professional / Self-report   | Active: 2.47                                                                   |

|                            |                |                                                                                                    |                                        |                                                   |                                                                     |                                |
|----------------------------|----------------|----------------------------------------------------------------------------------------------------|----------------------------------------|---------------------------------------------------|---------------------------------------------------------------------|--------------------------------|
| Kumar (2013)               | Asia<br>India  | Lucknow district,<br>Uttar Pradesh<br>state                                                        | Infants /<br>Children                  | Door To Door                                      | Health Professional /<br>Chart Review / Imaging                     | Lifetime: 1.25                 |
| Mani (1998)                | Asia<br>India  | Yelandur sub-<br>district, Karnataka<br>state                                                      | All                                    | Door To Door                                      | Health Professional /<br>Self-report                                | Active: 3.91<br>Lifetime: 4.19 |
| Radhakrishnan (2000)       | Asia<br>India  | Thrissur,<br>Palakkad, and<br>Malappuram<br>districts, Kerala<br>state                             | All                                    | Door To Door                                      | Health Professional                                                 | Active: 4.93                   |
| Raina (2011)               | Asia<br>India  | R.S. Pura town,<br>Jammu district                                                                  | Infants /<br>Children                  | Door To Door                                      | Health Professional                                                 | Active: 2.02                   |
| Razdan (1994) <sup>†</sup> | Asia<br>India  | Kuthar Valley,<br>South Kashmir,<br>Northwest India                                                | All                                    | Door To Door                                      | Health Professional                                                 | Active: 2.47                   |
| Saha (2003)                | Asia<br>India  | Baruipur block,<br>South 24-<br>Parganas district,<br>West Bengal state                            | Unknown                                | Door To Door                                      | Health Professional                                                 | Active: 17.27                  |
| Shah (2009)                | Asia<br>India  | Kashmir Valley                                                                                     | Children /<br>Adolescents              | School Survey                                     | Health Professional /<br>Self-report                                | Lifetime: 3.22                 |
| Singh (1997)               | Asia<br>India  | Chandigarh                                                                                         | All                                    | Door To Door                                      | Health Professional /<br>Self-report                                | Lifetime: 4.20                 |
| Sureka (2007)              | Asia<br>India  | Churu Tehsil,<br>Rajasthan state                                                                   | Unknown                                | Door To Door                                      | Health Professional /<br>Self-report / Public<br>Awareness Campaign | Active: 3.00                   |
| Mohammadi (2006)           | Asia<br>Iran   | National sample                                                                                    | Adults /<br>Elderly                    | Door To Door                                      | Health Professional /<br>Chart Review                               | Lifetime: 18.03                |
| Noorbala (2004)            | Asia<br>Iran   | National sample                                                                                    | Adolescents<br>/Adults /<br>Elderly    | Door To Door                                      | Health Professional                                                 | Lifetime: 1.20                 |
| Bar-Dayyan (2010)          | Asia<br>Israel | National sample                                                                                    | Adolescents                            | Military Services<br>Evaluation                   | Health Professional                                                 | Lifetime: 6.63                 |
| Pollak (2009)              | Asia<br>Israel | National sample                                                                                    | Adolescents                            | Military Services<br>Evaluation                   | Health Professional                                                 | Lifetime: 16.70                |
| Zaid (2008)                | Asia<br>Israel | Bedouin Sector,<br>from Rahat in the<br>Northern Negev, to<br>Bi'er Hadag in the<br>Southern Negev | Infants /<br>Children /<br>Adolescents | Hospital Clinic Review /<br>Prescription Database | Health Professional /<br>Chart Review /<br>Prescription Use / EEG   | Lifetime: 4.01                 |
| Kimura (1998)              | Asia<br>Japan  | Kurayoshi area                                                                                     | Infants /<br>Children /<br>Adolescents | Hospital Clinic Review                            | Health Professional /<br>Chart Review                               | Active: 3.70                   |

|                              |                             |                                                  |                                        |                                                        |                                                         |                                  |
|------------------------------|-----------------------------|--------------------------------------------------|----------------------------------------|--------------------------------------------------------|---------------------------------------------------------|----------------------------------|
| Nakashima (1996)             | <b>Asia</b><br>Japan        | Daisen town,<br>Tottori prefecture               | All                                    | Mail Survey / Hospital<br>Clinic Review                | Chart Review / Self-<br>report                          | Lifetime: 4.40                   |
| Oka (2006)                   | <b>Asia</b><br>Japan        | Okayama<br>prefecture                            | Infants /<br>Children                  | Hospital Clinic Review                                 | Chart Review / EEG                                      | Active: 5.30                     |
| Lee (2012)                   | <b>Asia</b><br>Korea        | National sample                                  | All                                    | Administrative Database /<br>Prescription Database     | Administrative Codes /<br>Prescription Database         | Lifetime: 2.41                   |
| Tran (2006)                  | <b>Asia</b><br>Laos         | Hinheub district,<br>Vientiane Province          | Unknown                                | Door To Door                                           | Health Professional /<br>EEG                            | Active: 7.66                     |
| Sauvey (2005)                | <b>Asia</b><br>Nepal        | Makwanpur District                               | Infants /<br>Children /<br>Adolescents | Census                                                 | Self-report                                             | Lifetime: 8.44                   |
| Aziz (1994) <sup>9</sup>     | <b>Asia</b><br>Pakistan     | Karachi                                          | Children /<br>Adolescents /<br>Adults  | Door To Door                                           | Health Professional /<br>Self-report                    | Active: 9.99<br>Lifetime: 11.44  |
| Aziz (1997) <sup>9,n</sup>   | <b>Asia</b><br>Pakistan     | Karachi                                          | Children /<br>Adolescents /<br>Adults  | Door To Door                                           | Health Professional /<br>Self-report                    | Active: 9.99                     |
| Aziz (1997) <sup>9</sup>     | <b>Asia</b><br>Pakistan     | Karachi                                          | Children /<br>Adolescents /<br>Adults  | Door To Door                                           | Health Professional /<br>Self-report                    | Active: 9.99                     |
| Durkin (1992) <sup>o</sup>   | <b>Asia</b><br>Pakistan     | Greater Karachi                                  | Children                               | Convenience Sample Of<br>Rural And Urban Zones         | Health Professional /<br>Self-report                    | Active: 12.40<br>Lifetime: 15.50 |
| Al Rajeh (1993) <sup>h</sup> | <b>Asia</b><br>Saudi Arabia | Thugbah<br>community,<br>Eastern Province        | All                                    | Door To Door                                           | Health Professional                                     | Active: 6.54                     |
| Al Rajeh (2001) <sup>h</sup> | <b>Asia</b><br>Saudi Arabia | Thugbah<br>community,<br>Eastern Province        | All                                    | Door To Door                                           | Health Professional                                     | Active: 6.54                     |
| Al Salloum (2011)            | <b>Asia</b><br>Saudi Arabia | Every<br>administrative<br>region                | Infants /<br>Children /<br>Adolescents | Door To Door                                           | Health Care Professional                                | Active: 0.88                     |
| Kun (1999)                   | <b>Asia</b><br>Singapore    | National sample                                  | Adults                                 | Compulsory Military<br>Service Review                  | Health Professional /<br>Chart Review                   | Lifetime (men<br>only): 4.33     |
| Puvanendran (1993)           | <b>Asia</b><br>Singapore    | National Sample                                  | All                                    | Hospitals, School health<br>clinics, Military Draftees | Health Professional                                     | Active: 0.75<br>Lifetime: 3.82   |
| Chen (2006)                  | <b>Asia</b><br>Taiwan       | Keelung city                                     | Adults /<br>Elderly                    | Unable To Determine                                    | Health Professional                                     | Active: 2.71<br>Lifetime: 3.81   |
| Su (1998)                    | <b>Asia</b><br>Taiwan       | Ilan county                                      | Adults /<br>Elderly                    | Door To Door                                           | Health Professional /<br>Chart Review / Self-<br>report | Active: 3.28                     |
| Asawavichienjinda<br>(2002)  | <b>Asia</b><br>Thailand     | Talardkav sub-<br>district, Nakhon<br>Ratchasima | All                                    | Door To Door                                           | Health Professional                                     | Active: 7.25                     |

|                        |                          |                                                                                         |                                  |                                                                                                                |                                                             |                                 |
|------------------------|--------------------------|-----------------------------------------------------------------------------------------|----------------------------------|----------------------------------------------------------------------------------------------------------------|-------------------------------------------------------------|---------------------------------|
|                        |                          | province                                                                                |                                  |                                                                                                                |                                                             |                                 |
| Tuan (2008)            | <b>Asia</b><br>Vietnam   | BaVi district, Ha Tay Province                                                          | All                              | Door To Door                                                                                                   | Health Professional / Self-report                           | Active: 4.36                    |
| Kruja (2012)           | <b>Europe</b><br>Albania | Tirana and Saranda districts                                                            | All                              | Door To Door                                                                                                   | Health Professional / Self-report / Chart Review            | Lifetime: 13.98                 |
| Bielen (2007)          | <b>Europe</b><br>Croatia | Central Croatia, Slavonia, Istria and Kvarner, Dalmatia, and the City of Zagreb regions | All                              | Unable To Determine                                                                                            | Health Professional / EEG                                   | Active: 4.82                    |
| Josipovic-Jelic (2011) | <b>Europe</b><br>Croatia | Sibenik-Knin County, Dalmatia region                                                    | All                              | Hospital Clinic Review                                                                                         | Health Professional / Chart Review / Imaging                | Active: 10.90                   |
| Christensen (2007)     | <b>Europe</b><br>Denmark | National sample                                                                         | All                              | Registry                                                                                                       | Administrative Data Codes                                   | Active: 5.69                    |
| Swiderska (2011)       | <b>Europe</b><br>England | West Cheshire Health District                                                           | Adolescents                      | Hospital Clinic Review / Health Surveillance Computer Database                                                 | Health Professional / Chart Review                          | Lifetime: 4.07                  |
| Wright (2000)          | <b>Europe</b><br>England | Bradford                                                                                | All                              | Hospital Clinic Review                                                                                         | Chart Review / Administrative Data Codes / Prescription Use | Active: 4.49<br>Lifetime: 7.29  |
| Oun (2003)             | <b>Europe</b><br>Estonia | Tartu                                                                                   | Adults / Elderly                 | Hospital Clinic Review / Prescription Database                                                                 | Health Professional                                         | Active: 5.26                    |
| Beilmann (1999)        | <b>Europe</b><br>Estonia | Tartu                                                                                   | Infants / Children / Adolescents | Hospital Clinic Review                                                                                         | Health Professional / Chart Review / Imaging / EEG          | Active: 3.56                    |
| Eriksson (1997)        | <b>Europe</b><br>Finland | District of the Tampere University Hospital                                             | Infants / Children / Adolescents | Hospital Clinic Review                                                                                         | Chart Review                                                | Active: 3.94                    |
| Munoz (1995)           | <b>Europe</b><br>France  | Haute-Vienne district, Limousin region                                                  | All                              | Door To Door                                                                                                   | Health Professional / Screening Questionnaire               | Lifetime: 7.68                  |
| Picot (2008)           | <b>Europe</b><br>France  | Béziers                                                                                 | Adolescents / Adults / Elderly   | Hospital Clinic Review / Registry / Administrative Database / Media Campaign, Electoral Roll, Physician Survey | Health Professional / Chart Review / Imaging / EEG          | Active: 4.97<br>Lifetime: 6.06  |
| Lomidze (2012)         | <b>Europe</b><br>Georgia | Tbilisi                                                                                 | All                              | Door To Door                                                                                                   | Health Professional / Self-report / Chart Review / Imaging  | Active: 8.76<br>Lifetime: 11.45 |

|                   |                              |                                                                     |                                  |                                                                                                         |                                                        |                                 |
|-------------------|------------------------------|---------------------------------------------------------------------|----------------------------------|---------------------------------------------------------------------------------------------------------|--------------------------------------------------------|---------------------------------|
| Stranjalis (2009) | <b>Europe</b><br>Greece      | Corfu district                                                      | All                              | Unable To Determine                                                                                     | Unable to Determine                                    | Active: 2.26                    |
| Blichfeld (2004)  | <b>Europe</b><br>Greenland   | 13 out of 18 hospitals                                              | Infants / Children / Adolescents | Hospital survey                                                                                         | Health Professional                                    | Lifetime: 3.40                  |
| Olafsson (1999)   | <b>Europe</b><br>Iceland     | 37 of 42 medical districts in rural Iceland                         | All                              | Hospital Clinic Review                                                                                  | Chart Review / EEG                                     | Lifetime: 4.77                  |
| Linehan (2010)    | <b>Europe</b><br>Ireland     | National sample                                                     | All                              | Hospital Clinic Review / Administrative Database / Prescription Database / National Statistics Database | Chart Review / Administrative Data Codes / Self-report | Lifetime: 10.00                 |
| Gallitto (2005)   | <b>Europe</b><br>Italy       | Aeolian archipelago, Sicily                                         | All                              | Hospital Clinic Review                                                                                  | Health Professional / Chart Review / EEG               | Active: 3.13<br>Lifetime: 3.50  |
| Maremmani (1991)  | <b>Europe</b><br>Italy       | Vecchiano, Northwest Tuscany                                        | All                              | Hospital Clinic Review / Prescription Database                                                          | Chart Review / Prescription Use                        | Active: 5.12                    |
| Rocca (2001)      | <b>Europe</b><br>Italy       | Riposto, Santa Teresa de Riva, and Terrasini municipalities, Sicily | All                              | Door To Door                                                                                            | Health Professional / Self-report                      | Active: 3.31<br>Lifetime: 4.53  |
| Cornaggia (1990)  | <b>Europe</b><br>Italy       | Lombardy province                                                   | Adults                           | Presented For Military Service                                                                          | Health Professional / EEG                              | Active: 4.73                    |
| Endziniene (1997) | <b>Europe</b><br>Lithuania   | Kaunas                                                              | Infants / Children / Adolescents | Hospital Clinic Review                                                                                  | Chart Review                                           | Active: 4.25                    |
| Shackleton (1997) | <b>Europe</b><br>Netherlands | 6 medium-sized cities                                               | All                              | Prescription Database                                                                                   | Prescription Use                                       | Active: 4.80                    |
| Breteler (1996)   | <b>Europe</b><br>Netherlands | Ommoord, Rotterdam                                                  | Adults / Elderly                 | Unable To Determine                                                                                     | Health Professional / Chart Review / Self-report       | Active: 9.17<br>Lifetime: 15.29 |
| Lossius (2006)    | <b>Europe</b><br>Norway      | Akershus                                                            | Children / Adolescents           | School Survey                                                                                           | Self-report                                            | Lifetime: 15.35                 |
| Svendsen (2007)   | <b>Europe</b><br>Norway      | Oppland county                                                      | Adults / Elderly                 | Unable To Determine                                                                                     | Self-report                                            | Active: 3.16<br>Lifetime: 6.76  |
| Waalder (2000)    | <b>Europe</b><br>Norway      | Hordaland county, Western Norway                                    | Children / Adolescents           | Hospital Clinic Review                                                                                  | Chart Review / EEG                                     | Active: 5.13                    |
| Brodtkorb (2008)  | <b>Europe</b><br>Norway      | Vågå, Southern Norway                                               | Adults / Elderly                 | Unable To Determine                                                                                     | Health Professional / Chart Review / Self-report       | Active: 6.70<br>Lifetime: 11.70 |



|                          |                         |                                                                                                                        |                                        |                                                                 |                                      |                                 |
|--------------------------|-------------------------|------------------------------------------------------------------------------------------------------------------------|----------------------------------------|-----------------------------------------------------------------|--------------------------------------|---------------------------------|
| Guekht (2010)            | <b>Europe</b><br>Russia | Moscow city,<br>Moscow suburbs,<br>Yaroslavl,<br>Ekaterinburg,<br>Irkutsk city, Bratsk,<br>and Republic of<br>Burjatia | Adolescents /<br>Adults /<br>Elderly   | Hospital Clinic Review                                          | Health Professional /<br>EEG         | Active: 3.39                    |
| Pavlovic (1998)          | <b>Europe</b><br>Serbia | Kruševac district,<br>Central Serbia                                                                                   | Children                               | Hospital Clinic Review                                          | Health Professional                  | Active: 4.20                    |
| Lobo-Escolar (2008)      | <b>Europe</b><br>Spain  | Zaragoza                                                                                                               | Adults /<br>Elderly                    | Unable To Determine                                             | Health Professional /<br>Self-report | Lifetime: 6.25                  |
| Luengo (2001)            | <b>Europe</b><br>Spain  | Madrid and 4<br>neighboring towns                                                                                      | All                                    | Hospital Clinic Review                                          | Health Professional                  | Lifetime: 4.12                  |
| Sangrador (1991)         | <b>Europe</b><br>Spain  | Valladolid,<br>Autonomous<br>region of Castilla-<br>Léon                                                               | Children /<br>Adolescents              | Door To Door / School<br>Survey                                 | Self-report                          | Active: 3.71<br>Lifetime: 5.55  |
| Benavente (2009)         | <b>Europe</b><br>Spain  | Huesca Province                                                                                                        | Children /<br>Adolescents              | Hospital Clinic Review                                          | Chart Review / Self-<br>report       | Active: 6.31<br>Lifetime: 7.50  |
| Forsgren (1992)          | <b>Europe</b><br>Sweden | Västerbotten<br>Province, Northern<br>Sweden                                                                           | Adults /<br>Elderly                    | Hospital Clinic Review                                          | Chart Review / Self-<br>report       | Active: 5.53                    |
| Larsson (2006)           | <b>Europe</b><br>Sweden | Uppsala county,<br>Mid-Eastern<br>Sweden                                                                               | Infants /<br>Children /<br>Adolescents | Hospital Clinic Review                                          | Chart Review                         | Active: 3.41                    |
| Sidenvall (1996)         | <b>Europe</b><br>Sweden | Västerbotten<br>Province, Northern<br>Sweden                                                                           | Infants /<br>Children /<br>Adolescents | Hospital Clinic Review /<br>Registry                            | Chart Review / Self-<br>report       | Active: 4.24                    |
| Aydin (2002)             | <b>Europe</b><br>Turkey | Izmir                                                                                                                  | Children /<br>Adolescents              | Mail Survey / Sent Letters<br>To Students Of School<br>Division | Health Professional /<br>Self-report | Active: 6.00<br>Lifetime: 11.00 |
| Aziz (1997) <sup>n</sup> | <b>Europe</b><br>Turkey | Ankara, Elmadag<br>township,<br>Kutludugun village                                                                     | Children /<br>Adolescents /<br>Adults  | Door To Door                                                    | Health Professional /<br>Self-report | Active: 7.42                    |
| Calisir (2006)           | <b>Europe</b><br>Turkey | Bursa Province,<br>Western Turkey                                                                                      | All                                    | Door To Door                                                    | Health Professional                  | Active:8.51<br>Lifetime: 12.20  |
| Huseyinoglu (2011)       | <b>Europe</b><br>Turkey | Kars Province,<br>Eastern Anatolian<br>Region                                                                          | Children /<br>Adolescents              | School in the area                                              | Health Professional                  | Active: 8.62<br>Lifetime: 13.54 |
| Karaagac (2001)          | <b>Europe</b><br>Turkey | Silivri, Thrace,<br>Marmara region                                                                                     | All                                    | Door To Door                                                    | Health Professional /<br>Self-report | Active: 10.20                   |

|                       |                                |                                                  |                                  |                                                  |                                                   |                                |
|-----------------------|--------------------------------|--------------------------------------------------|----------------------------------|--------------------------------------------------|---------------------------------------------------|--------------------------------|
| Karabiber (2001)      | <b>Europe</b><br>Turkey        | Malatya Province                                 | Children / Adolescents           | Randomly Selected Schools                        | Health Professional / Self-report                 | Lifetime: 7.97                 |
| Kocak (2013)          | <b>Europe</b><br>Turkey        | National sample                                  | Adults                           | Registry                                         | Health Professional/Medical Chart Review          | Lifetime: 1.59                 |
| Okan (1995)           | <b>Europe</b><br>Turkey        | Gemlik county                                    | Infants / Children               | Door To Door                                     | Health Professional / Self-report                 | Lifetime: 9.20                 |
| Onal (2002)           | <b>Europe</b><br>Turkey        | Istanbul                                         | All                              | Unclear                                          | Health Professional/ EEG                          | Active: 5.90<br>Lifetime: 7.80 |
| Sahin (2004)          | <b>Europe</b><br>Turkey        | Sivas Region, Middle Anatolia                    | All                              | Door To Door                                     | Health Professional / Self-report                 | Active: 8.77                   |
| Serdaroglu (2004)     | <b>Europe</b><br>Turkey        | National sample                                  | Infants / Children / Adolescents | Unable To Determine                              | Unable to Determine                               | Lifetime: 8.20                 |
| Topbas (2012)         | <b>Europe</b><br>Turkey        | Trabzon city, Trabzon Province, Northeast Turkey | Infants / Children / Adolescents | Door To Door / Hospital Clinic Review            | Health Professional / Chart Review                | Lifetime: 8.63                 |
| Velioglu (2010)       | <b>Europe</b><br>Turkey        | Trabzon city, Trabzon Province, Northeast Turkey | Adolescents / Adults / Elderly   | Unable To Determine                              | Health Professional / Self-report / Imaging / EEG | Active: 5.33<br>Lifetime: 6.47 |
| Currie (1998)         | <b>Europe</b><br>UK            | South Glamorgan Health District, Wales           | All                              | Administrative Database                          | Administrative Data Codes                         | Lifetime: 5.55                 |
| Gaitatzis (2004)      | <b>Europe</b><br>UK            | England and Wales' national samples              | Adolescents / Adults / Elderly   | Administrative Database                          | Administrative Data Codes                         | Lifetime: 5.60                 |
| MacDonald (2000)      | <b>Europe</b><br>UK            | Central London hospital                          | All                              | Administrative Database                          | Medical chart review/ Health Professional         | Lifetime: 4.00                 |
| Martinez (2009)       | <b>Europe</b><br>UK            | National sample                                  | All                              | General Practice Research Database               | Epilepsy Read Codes                               | Active: 7.16                   |
| Morgan (2000)         | <b>Europe</b><br>UK            | South Glamorgan Health District, Wales           | All                              | Administrative Database                          | Administrative Data Codes                         | Active: 6.80                   |
| Tallis (1991)         | <b>Europe</b><br>UK            |                                                  | All                              | Hospital Clinic Review / Administrative Database | Chart Review / Prescription Use                   | Active: 9.00                   |
| Tidman (2003)         | <b>Europe</b><br>UK            | West Cheshire                                    | Children                         | Hospital Clinic Review                           | Chart Review / EEG                                | Active: 4.34                   |
| Wallace (1998)        | <b>Europe</b><br>UK            | General Practice database England & Wales        | All                              | Hospital / Clinic Review / Other                 | Health Care Professional / Prescription Use       | Active: 5.15                   |
| Fuller-Thomson (2009) | <b>North America</b><br>Canada | National sample                                  | All                              | Canadian Community Health Survey (CCHS) 1.1      | Self-report                                       | Lifetime: 6.00                 |
| Hinnell (2010)        | <b>North America</b><br>Canada | National sample                                  | All                              | Canadian Community Health Survey 1.1, 2.1,       | Self-report                                       | Lifetime: 6.39                 |

|                                    |                                       |                                                                                     |                                        |                                                                           |                                                         |                                                                |
|------------------------------------|---------------------------------------|-------------------------------------------------------------------------------------|----------------------------------------|---------------------------------------------------------------------------|---------------------------------------------------------|----------------------------------------------------------------|
|                                    |                                       |                                                                                     |                                        | 3.1                                                                       |                                                         |                                                                |
| Kozyrskyj (2004)                   | <b>North America</b><br>Canada        | Manitoba                                                                            | Infants /<br>Children /<br>Adolescents | Administrative Database                                                   | Administrative Data<br>Codes                            | Lifetime: 4.70                                                 |
| Prasad (2011)                      | <b>North America</b><br>Canada        | National sample                                                                     | Infants /<br>Children /<br>Adolescents | National Longitudinal<br>Survey of Children and<br>Youth                  | Self-report                                             | Lifetime: 4.03<br>(1996/1997)<br>Lifetime: 5.26<br>(1998/1999) |
| Schiariti (2009)                   | <b>North America</b><br>Canada        | British Columbia                                                                    | Infants /<br>Children /<br>Adolescents | Administrative Database                                                   | Administrative Data<br>Codes                            | Active: 5.50                                                   |
| Tellez Zenteno (2004) <sup>l</sup> | <b>North America</b><br>Canada        | National sample                                                                     | All                                    | CCHS 1.1 & National<br>Population Health Survey<br>(NPHS) Sampling Frames | Self-report                                             | Lifetime: 5.60<br>(CCHS)<br>Lifetime: 5.20<br>(NPHS)           |
| Tellez-Zenteno (2005) <sup>l</sup> | <b>North America</b><br>Canada        | National sample                                                                     | All                                    | CCHS 1.1 & NPHS<br>Sampling Frames                                        | Self-report                                             | Lifetime: 5.60<br>(CCHS)<br>Lifetime: 5.20<br>(NPHS)           |
| Tellez-Zenteno (2007)              | <b>North America</b><br>Canada        | National sample                                                                     | Adolescents /<br>Adults /<br>Elderly   | CCHS 1.2 Sampling<br>Frame                                                | Self-report                                             | Lifetime: 6.84                                                 |
| Wiebe (1999)                       | <b>North America</b><br>Canada        | Ontario                                                                             | All                                    | Ontario Health Survey<br>Sampling Frame                                   | Self-report                                             | Lifetime: 5.80                                                 |
| Garcia-Noval (2001)                | <b>North America</b><br>Guatemala     | Quesada and El<br>Jocote,<br>Department of<br>Jutiapa,<br>Southeastern<br>Guatemala | All                                    | Census                                                                    | Health Professional /<br>Self-report                    | Active: 17.89                                                  |
| Mendizabal (1996)                  | <b>North America</b><br>Guatemala     | Small rural village                                                                 | All                                    | Unable To Determine                                                       | Unable to Determine                                     | Active: 5.84<br>Lifetime: 8.50                                 |
| Medina (2005)                      | <b>North America</b><br>Honduras      | Salamá County                                                                       | All                                    | Door To Door                                                              | Health Professional /<br>Self-report / Imaging /<br>EEG | Active: 15.45<br>Lifetime: 23.33                               |
| Durkin (1992) <sup>o</sup>         | <b>North America</b><br>Jamaica       | Rural parish of<br>Clarendon                                                        | Children                               | Convenience Sample Of<br>Rural And Urban Zones                            | Health Professional /<br>Self-report                    | Active: 5.20<br>Lifetime: 5.80                                 |
| Gracia (1990)                      | <b>North America</b><br>Panama        | Changuinola,<br>Bocas del Toro<br>province                                          | Lifetime                               | Door To Door                                                              | Health Professional /<br>Self-report                    | Active: 57.23<br>Lifetime: 75.30                               |
| Boyle (1994)                       | <b>North America</b><br>United States | National sample                                                                     | Infants /<br>Children /<br>Adolescents | National Health Interview<br>Survey Sampling Frame                        | Self-report                                             | Lifetime: 8.90                                                 |

|                          |                                       |                                                |                                  |                                                  |                                                  |                                  |
|--------------------------|---------------------------------------|------------------------------------------------|----------------------------------|--------------------------------------------------|--------------------------------------------------|----------------------------------|
| Chong (2013)             | <b>North America</b><br>United States | Cochise, Santa Cruz, and Yuma in Arizona state | All                              | Door To Door/ Telephone Survey                   | Health Professional/ Chart Review/ Questionnaire | Active: 11.82<br>Lifetime: 12.90 |
| Chong (2010)             | <b>North America</b><br>United States | Arizona                                        | Adults / Elderly                 | Telephone Survey                                 | Self-report                                      | Active: 5.00<br>Lifetime: 13.12  |
| Elliott (2008)           | <b>North America</b><br>United States | Ohio                                           | Adults / Elderly                 | Telephone Survey                                 | Self-report                                      | Active: 8.60<br>Lifetime: 17.62  |
| Faught (2012)            | <b>North America</b><br>United States | National sample                                | Elderly                          | Administrative Database                          | Administrative Codes                             | Active: 10.80                    |
| Ferguson (2008)          | <b>North America</b><br>United States | South Carolina                                 | Adults / Elderly                 | Telephone Survey                                 | Self-report                                      | Active: 1.00<br>Lifetime: 2.00   |
| JAMA (1994) <sup>1</sup> | <b>North America</b><br>United States | National sample                                | All                              | Unable To Determine                              | Unable to Determine                              | Active: 4.70                     |
| Kelvin (2007)            | <b>North America</b><br>United States | New York City                                  | All                              | Telephone Survey                                 | Self-report                                      | Active: 5.06<br>Lifetime: 5.30   |
| Kobau (2004)             | <b>North America</b><br>United States | Georgia and Tennessee                          | Adults / Elderly                 | Telephone Survey                                 | Self-report                                      | Lifetime: 21.00                  |
| Kobau (2006)             | <b>North America</b><br>United States | National sample                                | Adults / Elderly                 | Mail Survey                                      | Self-report                                      | Active: 16.00<br>Lifetime: 29.00 |
| Kobau (2007)             | <b>North America</b><br>United States | California                                     | Adults / Elderly                 | Telephone Survey                                 | Self-report                                      | Active: 7.76<br>Lifetime: 13.25  |
| Kobau (2008)             | <b>North America</b><br>United States | 18 states                                      | Adults / Elderly                 | Telephone Survey                                 | Self-report                                      | Active: 8.40<br>Lifetime: 16.50  |
| Konda (2009)             | <b>North America</b><br>United States | National sample                                | Adults / Elderly                 | Telephone Survey                                 | Self-report                                      | Active: 8.03<br>Lifetime: 14.28  |
| Kurth (2010)             | <b>North America</b><br>United States | National sample                                | All                              | Administrative Database                          | Administrative Data Codes                        | Active: 3.40                     |
| Layne Moore (2009)       | <b>North America</b><br>United States | California                                     | Adults / Elderly                 | Telephone Survey                                 | Self-report                                      | Lifetime: 13.00                  |
| MMWR (2005)              | <b>North America</b><br>United States | South Carolina                                 | Adults / Elderly                 | Telephone Survey                                 | Self-report                                      | Active: 11.00<br>Lifetime: 22.00 |
| MMWR (2001)              | <b>North America</b><br>United States | Texas                                          | Adults / Elderly                 | Telephone Survey                                 | Self-report                                      | Lifetime: 15.50                  |
| MMWR (1994) <sup>1</sup> | <b>North America</b><br>United States | National sample                                | All                              | Telephone Survey                                 | Self-report                                      | Active: 4.70                     |
| Murphy (1995)            | <b>North America</b><br>United States | Atlanta, Georgia                               | Children                         | Hospital Clinic Review / Public School Records   | Chart Review / EEG                               | Lifetime: 6.00                   |
| Parko (2009)             | <b>North America</b><br>United States | Navajo Nation, Utah, Arizona and New Mexico    | All                              | Hospital Clinic Review / Administrative Database | Chart Review / Administrative Data Codes         | Active: 18.46                    |
| Russ (2012)              | <b>North America</b><br>United States | National sample                                | Infants / Children / Adolescents | Telephone Survey                                 | Self-report                                      | Active: 5.74<br>Lifetime: 10.67  |

|                            |                                   |                                                                                                      |                                  |                             |                                         |                                  |
|----------------------------|-----------------------------------|------------------------------------------------------------------------------------------------------|----------------------------------|-----------------------------|-----------------------------------------|----------------------------------|
| Kochen (2005) <sup>k</sup> | <b>South America</b><br>Argentina | Junín, Buenos Aires Province                                                                         | All                              | Random Sample Of City Units | Health Professional / Self-report / EEG | Active: 3.75<br>Lifetime: 6.22   |
| Melcon (2007) <sup>k</sup> | <b>South America</b><br>Argentina | Junín, Buenos Aires Province                                                                         | All                              | Random Sample Of City Units | Health Professional / Self-report / EEG | Active: 3.75<br>Lifetime: 6.22   |
| Somoza (2005)              | <b>South America</b><br>Argentina | Buenos Aires                                                                                         | Children / Adolescents           | School Survey               | Health Professional / Self-report       | Active: 2.60<br>Lifetime: 3.21   |
| Nicoletti (2005)           | <b>South America</b><br>Bolivia   | Cordillera Province, Santa Cruz Department, Southeastern Bolivia                                     | All                              | Door To Door                | Health Professional / Imaging / EEG     | Lifetime: 12.25                  |
| Nicoletti (1999)           | <b>South America</b><br>Bolivia   | Cordillera Province, Santa Cruz Department, Southeastern Bolivia                                     | All                              | Door To Door                | Health Professional / Imaging / EEG     | Lifetime: 12.46<br>Active: 11.25 |
| Gomes (2002)               | <b>South America</b><br>Brazil    | Rio de Janeiro                                                                                       | All                              | Door To Door                | Health Professional / Self-report       | Active: 5.09<br>Lifetime: 16.30  |
| Noronha (2007)             | <b>South America</b><br>Brazil    | Barão Geraldo, Campinas Municipality and Jaguaré & Santo Antônio, São José do Rio Preto Municipality | All                              | Door To Door                | Health Professional / Self-report       | Active: 5.40<br>Lifetime: 9.20   |
| Sampaio (2010)             | <b>South America</b><br>Brazil    | Paraisópolis, São Paulo city                                                                         | Infants / Children / Adolescents | Unable To Determine         | Health Professional                     | Active: 8.70<br>Lifetime: 9.71   |
| Borges (2004)              | <b>South America</b><br>Brazil    | São José do Rio Preto city                                                                           | All                              | Door To Door                | Health Professional / Self-report       | Active: 13.30<br>Lifetime: 18.60 |
| Lavados (1992)             | <b>South America</b><br>Chile     | El Salvador, Potrerillos, Diego de Almagro, and Barquitos localities in Copiapo province             | All                              | Hospital Clinic Review      | Chart Review                            | Active: 17.70                    |
| Velez (2006)               | <b>South America</b><br>Colombia  | National sample                                                                                      | All                              | Door To Door                | Health Professional / Imaging / EEG     | Active: 10.10<br>Lifetime: 13.24 |
| Basch (1997)               | <b>South America</b><br>Ecuador   | Paluguillo village                                                                                   | All                              | Unable To Determine         | Health Professional                     | Active: 22.62                    |
| Cruz (1999)                | <b>South America</b><br>Ecuador   | San Pablo del Lago village                                                                           | All                              | Door To Door                | Health Professional / EEG               | Active: 11.40                    |
| Del Brutto (2005)          | <b>South America</b>              | Atahualpa village                                                                                    | All                              | Door To Door                | Health Professional                     | Active: 7.45                     |

|                               |                                 |                                   |     |              |                     |                                 |
|-------------------------------|---------------------------------|-----------------------------------|-----|--------------|---------------------|---------------------------------|
|                               | Ecuador                         |                                   |     |              |                     | Lifetime: 9.94                  |
| Placencia (1992) <sup>l</sup> | <b>South America</b><br>Ecuador | El Carchi and<br>Imbabura Regions | All | Door To Door | Health Professional | Active: 7.97<br>Lifetime: 14.27 |
| Placencia (1994) <sup>l</sup> | <b>South America</b><br>Ecuador | El Carchi and<br>Imbabura Regions | All | Door To Door | Health Professional | Active: 7.97<br>Lifetime: 14.27 |

a-l: Two different publications with the same data

m-o: Estimates from a single publication
