# Supplementary material
Source: PubMed Central journal article supplement (PMC5272794)
Supplement: supp_WNL.0000000000003509_table_e2.pdf [file supp_WNL.0000000000003509_table_e2.pdf]

Table e-2. Incidence of Epilepsy by Continent and Incidence Type

| <b>Study</b>                   | <b>Continent, Country</b> | <b>Region/ Subpopulation</b>         | <b>Age Group Studied</b>         | <b>Data Sources</b> | <b>Diagnosed By</b>                     | <b>Incidence Type</b> | <b>Cumulative Incidence or Rate per 100,000 (persons per year or person-years)</b> |
|--------------------------------|---------------------------|--------------------------------------|----------------------------------|---------------------|-----------------------------------------|-----------------------|------------------------------------------------------------------------------------|
| Houinato (2013)                | <b>Africa</b><br>Benin    | Djidja community of Zou region       | All                              | Door To Door        | Health Care Professional                | Cumulative Incidence  | 69·40                                                                              |
| Khedr (2013)                   | <b>Africa</b><br>Egypt    | Upper Egypt (south of Cairo)         | All                              | Door To Door        | Health Care Professional / Imaging      | Rate                  | 152·00                                                                             |
| Mung'ala-Odera (2008)          | <b>Africa</b><br>Kenya    | Kilifi district (Sub-Saharan Africa) | Adolescents / Children / Infants | Door To Door        | Health Care Professional / Other        | Cumulative Incidence  | 187·00                                                                             |
| Ngugi (2013)                   | <b>Africa</b><br>Kenya    | Kilifi district (Sub-Saharan Africa) | All                              | Door To Door        | Health Care Professional / Chart Review | Rate                  | 76·89                                                                              |
| Rwiza (1992) <sup>a</sup>      | <b>Africa</b><br>Tanzania | Ulanga district                      | All                              | Cannot Determine    | Health Care Professional / Self-report  | Cumulative Incidence  | 73·30                                                                              |
| Rwiza (1994) <sup>a</sup>      | <b>Africa</b><br>Tanzania | Ulanga district                      | All                              | Cannot Determine    | Health Care Professional / Self-report  | Cumulative Incidence  | 73·30                                                                              |
| Winkler (2009)                 | <b>Africa</b><br>Tanzania | Town of Haydom (northern Tanzania)   | All                              | Door To Door        | Health Care Professional / Other        | Cumulative Incidence  | 81·00                                                                              |
| Kaiser (2006)                  | <b>Africa</b><br>Uganda   | West Uganda                          | All                              | Door To Door        | Health Care Professional                | Rate                  | 215·00                                                                             |
| El Tallawy (2010) <sup>a</sup> | <b>Africa</b><br>Egypt    | Al Kharga district in New Valley     | Infants / Children / Adolescents | Door To Door        | Health Care Professional / Imaging      | Cumulative Incidence  | 43·10                                                                              |

|                                |                          |                                                 |                                  |                                                    |                                                      |                      |       |
|--------------------------------|--------------------------|-------------------------------------------------|----------------------------------|----------------------------------------------------|------------------------------------------------------|----------------------|-------|
| El Tallawy (2013) <sup>a</sup> | <b>Africa</b><br>Egypt   | Al Kharga district in New Valley                | All                              | Door To Door                                       | Health Care Professional / Imaging                   | Cumulative Incidence | 43·14 |
| El Tallawy (2013)              | <b>Africa</b><br>Egypt   | Al Kharga district in New Valley                | All                              | Door To Door                                       | Health Care Professional / Self-report Questionnaire | Cumulative Incidence | 48·00 |
| Mani (1998)                    | <b>Asia</b><br>India     | Yelandur taluk Karnataka State (Southern India) | All                              | Door To Door                                       | Health Care Professional                             | Cumulative Incidence | 49·30 |
| Saha (2008)                    | <b>Asia</b><br>India     | Parganas district (West Bengal)                 | All                              | Door To Door                                       | Health Care Professional                             | Cumulative Incidence | 28·77 |
| Celikkas (2010)                | <b>Europe</b><br>Turkey  | City of Eskisehir (Central Anatolia Region)     | Adolescents / Adults / Elderly   | Administrative Database / Hospital / Clinic Review | Health Care Professional                             | Cumulative Incidence | 37·59 |
| Christensen (2007)             | <b>Europe</b><br>Denmark | Denmark                                         | All                              | Administrative Database / Registry                 | Administrative Codes                                 | Rate                 | 68·80 |
| Eltze (2013)                   | <b>Europe</b><br>England | Northern England                                | Infants / Children               | Hospital / Clinic Review                           | Health Care Professional / Imaging                   | Cumulative Incidence | 53·60 |
| Heaney (2002)                  | <b>Europe</b><br>England | South-East England                              | All                              | Hospital / Clinic Review                           | Chart Review                                         | Rate                 | 51·73 |
| Martinez (2009)                | <b>Europe</b><br>England | UK General Practice Research Database           | All                              | Hospital / Clinic Review / Administrative Database | Health Care Professional / Administrative Data Codes | Rate                 | 50·10 |
| Beilmann (1999)                | <b>Europe</b><br>Estonia | Southern and North-Eastern Estonia              | Adolescents / Children / Infants | Other                                              | Health Care Professional                             | Cumulative Incidence | 15·10 |
| Oun (2003)                     | <b>Europe</b><br>Estonia | Town of Tartu                                   | Adults / Elderly                 | Hospital / Clinic Review / Other                   | Health Care Professional                             | Rate                 | 35·40 |
| Gissler (1998)                 | <b>Europe</b><br>Finland | Finland                                         | Children                         | Administrative Database / Prescription Database    | Administrative Data Codes                            | Cumulative Incidence | 97·43 |

|                               |                              |                                            |                                  |                                                               |                                                                           |                      |       |
|-------------------------------|------------------------------|--------------------------------------------|----------------------------------|---------------------------------------------------------------|---------------------------------------------------------------------------|----------------------|-------|
| Sillanpaa (2006) <sup>a</sup> | <b>Europe</b><br>Finland     | Finland                                    | All                              | Registry                                                      | Health Care Professional / Registry / Prescription Use                    | Cumulative Incidence | 48-90 |
| Sillanpaa (2011) <sup>a</sup> | <b>Europe</b><br>Finland     | Finland                                    | All                              | Registry                                                      | Health Care Professional / Registry / Prescription Use                    | Cumulative Incidence | 48-90 |
| Doerfer (1987)                | <b>Europe</b><br>Germany     | Altenburg, East Germany                    | Adolescents / Children / Infants | Cannot Determine                                              | Cannot Determine                                                          | Rate                 | 52-10 |
| Freitag (2001)                | <b>Europe</b><br>Germany     | Heidelberg and Mannheim (Southern Germany) | Adolescents / Children / Infants | Hospital / Clinic Review / Other                              | Chart Review / Other                                                      | Cumulative Incidence | 60-70 |
| Stranjalis (2009)             | <b>Europe</b><br>Greece      | Corfu district                             | All                              | Administrative Database / Hospital / Clinic Review            | Chart Review / Health Care Professional                                   | Cumulative Incidence | 58-40 |
| Astradsson (1998)             | <b>Europe</b><br>Iceland     | Iceland                                    | Adolescents / Children / Infants | Hospital / Clinic Review / Other / Telephone Survey           | Chart Review / Other                                                      | Cumulative Incidence | 0-94  |
| Olafsson (1996)               | <b>Europe</b><br>Iceland     | 37 rural medical districts                 | All                              | Hospital / Clinic Review / Other                              | Chart Review / Other                                                      | Cumulative Incidence | 46-54 |
| Olafsson (2005)               | <b>Europe</b><br>Iceland     | Iceland                                    | All                              | Administrative Database / Hospital / Clinic Review / Other    | Chart Review / Health Care Professional                                   | Rate                 | 56-79 |
| Casetta (2012)                | <b>Europe</b><br>Italy       | Province of Ferrara, northern Italy        | Adolescents / Children / Infants | Hospital / Clinic Review / Registry / Administrative Database | Health Care Professional / Administrative Codes / Registry / Chart Review | Rate                 | 57-00 |
| Kotsopoulos (2005)            | <b>Europe</b><br>Netherlands | City of Maastricht                         | Adolescents / Adults / Elderly   | Hospital / Clinic Review / Other                              | Health Care Professional                                                  | Cumulative Incidence | 30-00 |
| Shackleton (1997)             | <b>Europe</b><br>Netherlands | Six medium-sized Dutch cities              | All                              | Prescription Database                                         | Prescription Use                                                          | Rate                 | 72-00 |

|                   |                                  |                                                                        |                                  |                                                    |                                                                |                           |                                                       |
|-------------------|----------------------------------|------------------------------------------------------------------------|----------------------------------|----------------------------------------------------|----------------------------------------------------------------|---------------------------|-------------------------------------------------------|
| Pavlovic (1998)   | <b>Europe</b><br>Serbia          | Krusevac district (Central Serbia)                                     | Children                         | Hospital / Clinic Review                           | Health Care Professional / Chart Review                        | Cumulative Incidence      | 43-50                                                 |
| Dura-Trave (2008) | <b>Europe</b><br>Spain           | Chartered community of Navarre                                         | Adolescents / Children / Infants | Hospital / Clinic Review                           | Health Care Professional                                       | Cumulative Incidence      | 62-60                                                 |
| Adelow (2009)     | <b>Europe</b><br>Sweden          | City of Stockholm                                                      | All                              | Hospital / Clinic Review / Mail Survey / Other     | Health Care Professional / Other                               | Rate                      | 33-90                                                 |
| Larsson (2006)    | <b>Europe</b><br>Sweden          | Uppsala County (Mid-Eastern Sweden)                                    | Adolescents / Children / Infants | Administrative Database                            | Chart Review / Other                                           | Cumulative Incidence      | 40-00                                                 |
| MacDonald (2000)  | <b>Europe</b><br>UK              | Tertiary referral centre (NHNN) in London                              | All                              | Administrative Database / Hospital / Clinic Review | Administrative Codes / Chart Review / Health Care Professional | Rate                      | 46-00                                                 |
| Tallis (1991)     | <b>Europe</b><br>UK              | General Practice database                                              | Elderly                          | Hospital / Clinic Review                           | Health Care Professional                                       | Cumulative Incidence/Rate | Cumulative Incidence:<br>69-00<br>Rate:<br>117-00     |
| Wallace (1998)    | <b>Europe</b><br>UK              | General Practice database England & Wales                              | All                              | Hospital / Clinic Review / Other                   | Health Care Professional / Prescription Use                    | Cumulative Incidence      | 80-76                                                 |
| Lavados (1992)    | <b>South America</b><br>Chile    | El Salvador, Potrerillos, Diego de Almagro, Barquitos (Northern Chile) | All                              | Hospital / Clinic Review                           | Health Care Professional                                       | Cumulative Incidence      | 113-00                                                |
| Medina (2005)     | <b>South America</b><br>Honduras | Salama County                                                          | All                              | Door To Door                                       | Health Care Professional / Other                               | Cumulative Incidence      | (1996-97):<br>92-69<br>(1998): 61-80<br>(1999): 15-45 |

|                     |                                     |                                                    |                                     |                                                           |                                                                             |                         |                                                       |
|---------------------|-------------------------------------|----------------------------------------------------|-------------------------------------|-----------------------------------------------------------|-----------------------------------------------------------------------------|-------------------------|-------------------------------------------------------|
|                     |                                     |                                                    |                                     |                                                           |                                                                             |                         | (2000): 30-90<br>(2001): 77-24<br>(2002-03):<br>61-80 |
| Placencia<br>(1992) | <b>South<br/>America</b><br>Ecuador | Andean Sierra<br>region<br>(Northern<br>Ecuador)   | All                                 | Door To Door                                              | Health Care<br>Professional                                                 | Cumulative<br>Incidence | 189.96                                                |
| Villaran<br>(2009)  | <b>South<br/>America</b><br>Peru    | Matapalo<br>district,<br>Zarumilla River<br>Valley | All                                 | Door To Door /<br>Other                                   | Health Care<br>Professional                                                 | Rate                    | 162-40                                                |
| Annegers<br>(1999)  | <b>North<br/>America</b><br>USA     | Houston, Texas                                     | All                                 | Administrative<br>Database                                | Administrative Codes                                                        | Rate                    | 35-50                                                 |
| Benn (2008)         | <b>North<br/>America</b><br>USA     | Northern<br>Manhattan,<br>New York City            | All                                 | Administrative<br>Database /<br>Hospital/Clinic<br>Review | Health Care<br>Professional                                                 | Rate                    | 38-60                                                 |
| Faught<br>(2012)    | <b>North<br/>America</b><br>USA     | Medicare<br>beneficiaries in<br>the USA            | Elderly                             | Administrative<br>Database                                | Administrative Codes                                                        | Cumulative<br>Incidence | 240-00                                                |
| Hussain<br>(2006)   | <b>North<br/>America</b><br>USA     | Bronx, New<br>York                                 | Elderly                             | Hospital / Clinic<br>Review / Telephone<br>Survey         | Health Care<br>Professional                                                 | Rate                    | 31-50                                                 |
| Wirrell<br>(2011)   | <b>North<br/>America</b><br>USA     | Olmsted<br>County,<br>Minnesota                    | Adolescents /<br>Children / Infants | Hospital / Clinic<br>Review                               | Health Care<br>Professional / Genetic<br>Review / Chart Review<br>/ Imaging | Rate                    | 46-90                                                 |

a- Two different publications from same group, with same data
