# Supplementary material
Source: PubMed Central journal article supplement (PMC5272794)
Supplement: supp_WNL.0000000000003509_table_e3.pdf [file supp_WNL.0000000000003509_table_e3.pdf]

Table e-3. Prevalence Studies Quality Assessment

| Study (Year)              | Q1: Target population described? | Q2: Cases from entire population or probability sampling? | Q3: Response rate >70%? | Q4: Non-responders clearly described? | Q5: Sample representative of population? | Q6: Data collection methods standardized? | Q7: Validated criteria to assess disease? | Q8: Were estimates given with confidence intervals or subgroups? | Total Quality Score (/8) |
|---------------------------|----------------------------------|-----------------------------------------------------------|-------------------------|---------------------------------------|------------------------------------------|-------------------------------------------|-------------------------------------------|------------------------------------------------------------------|--------------------------|
| Al Rajeh (1993)           | Yes                              | Yes                                                       | Yes                     | Yes                                   | Yes                                      | Yes                                       | NC                                        | No                                                               | 6                        |
| Al Rajeh (2001)           | Yes                              | Yes                                                       | Yes                     | Yes                                   | Yes                                      | Yes                                       | Yes                                       | Yes                                                              | 8                        |
| Al Salloum (2011)         | Yes                              | Yes                                                       | Yes                     | NR                                    | Yes                                      | Yes                                       | NC                                        | No                                                               | 5                        |
| Almu (2006)               | Yes                              | Yes                                                       | NR                      | NR                                    | Yes                                      | Yes                                       | No                                        | No                                                               | 4                        |
| Asawavichie njinda (2002) | Yes                              | Yes                                                       | No                      | No                                    | Yes                                      | NR                                        | No                                        | No                                                               | 3                        |
| Attia-Romdhane (1993)     | Yes                              | Yes                                                       | NR                      | NR                                    | Yes                                      | Yes                                       | Yes                                       | No                                                               | 5                        |
| Avode (2003)              | Yes                              | Yes                                                       | NR                      | NR                                    | Yes                                      | Yes                                       | Yes                                       | Yes                                                              | 6                        |
| Aydin (2002)              | Yes                              | Yes                                                       | NR                      | NR                                    | Yes                                      | Yes                                       | No                                        | No                                                               | 4                        |
| Aziz (1994)               | Yes                              | Yes                                                       | NR                      | NR                                    | Yes                                      | Yes                                       | Yes                                       | No                                                               | 5                        |
| Aziz (1997)               | Yes                              | Yes                                                       | NR                      | NR                                    | Yes                                      | Yes                                       | Yes                                       | No                                                               | 5                        |
| Aziz (1997)               | Yes                              | Yes                                                       | NR                      | NR                                    | Yes                                      | Yes                                       | Yes                                       | No                                                               | 5                        |
| Balogou (2007)            | Yes                              | Yes                                                       | No                      | No                                    | Yes                                      | Yes                                       | Yes                                       | Yes                                                              | 6                        |
| Banerjee (2009)           | Yes                              | Yes                                                       | No                      | No                                    | Yes                                      | Yes                                       | Yes                                       | Yes                                                              | 6                        |
| Bar-Dayam (2010)          | Yes                              | Yes                                                       | NR                      | NR                                    | Yes                                      | Yes                                       | No                                        | Yes                                                              | 5                        |
| Basch (1997)              | Yes                              | Yes                                                       | NR                      | NR                                    | Yes                                      | Yes                                       | No                                        | No                                                               | 4                        |
| Beilmann (1999)           | Yes                              | Yes                                                       | NR                      | NR                                    | Yes                                      | NC                                        | Yes                                       | Yes                                                              | 5                        |
| Benavente (2009)          | Yes                              | Yes                                                       | NR                      | NR                                    | Yes                                      | Yes                                       | Yes                                       | Yes                                                              | 6                        |
| Bharucha (1988)           | Yes                              | Yes                                                       | Yes                     | Yes                                   | Yes                                      | Yes                                       | Yes                                       | No                                                               | 7                        |
| Bielen (2007)             | Yes                              | Yes                                                       | Yes                     | Yes                                   | Yes                                      | Yes                                       | Yes                                       | Yes                                                              | 8                        |
| Birbeck (2004)            | Yes                              | Yes                                                       | NR                      | Yes                                   | Yes                                      | Yes                                       | NR                                        | No                                                               | 5                        |
| Blichfeldt (2004)         | Yes                              | Yes                                                       | Yes                     | Yes                                   | Yes                                      | NR                                        | NR                                        | No                                                               | 5                        |
| Bondestam                 | Yes                              | Yes                                                       | NR                      | NR                                    | Yes                                      | Yes                                       | NR                                        | No                                                               | 4                        |

|                      |     |     |     |     |     |     |     |     |   |
|----------------------|-----|-----|-----|-----|-----|-----|-----|-----|---|
| (1990)               |     |     |     |     |     |     |     |     |   |
| Borges (2004)        | Yes | Yes | NC  | Yes | Yes | Yes | Yes | Yes | 7 |
| Boyle (1994)         | Yes | Yes | Yes | NC  | Yes | Yes | Yes | No  | 6 |
| Breteler (1996)      | Yes | Yes | NC  | NR  | Yes | Yes | Yes | No  | 5 |
| Brodtkorb (2008)     | Yes | Yes | NR  | NR  | Yes | NC  | Yes | No  | 4 |
| Calisir (2006)       | Yes | Yes | NR  | NR  | Yes | Yes | Yes | Yes | 6 |
| Chen (2006)          | Yes | Yes | NR  | NR  | Yes | Yes | Yes | Yes | 6 |
| Chong (2010)         | Yes | Yes | NR  | NR  | Yes | Yes | Yes | Yes | 6 |
| Chong (2013)         | Yes | Yes | No  | Yes | Yes | Yes | Yes | Yes | 7 |
| Christensen (2007)   | Yes | No  | 7 |
| Christianson (2000)  | Yes | Yes | NR  | NR  | Yes | Yes | No  | No  | 4 |
| Coleman (2002)       | Yes | Yes | Yes | No  | Yes | Yes | NC  | Yes | 6 |
| Cornaggia (1990)     | Yes | No  | 7 |
| Couper (2002)        | Yes | Yes | NR  | NR  | Yes | Yes | Yes | Yes | 6 |
| Cruz (1999)          | Yes | Yes | NR  | NR  | Yes | Yes | Yes | Yes | 6 |
| Currie (1998)        | Yes | Yes | Yes | Yes | Yes | NC  | Yes | No  | 6 |
| Das (2006)           | Yes | Yes | NR  | NC  | Yes | Yes | Yes | Yes | 6 |
| Das (2008)           | Yes | Yes | NR  | NR  | Yes | Yes | Yes | Yes | 6 |
| Debrock (2000)       | Yes | Yes | NR  | NR  | Yes | Yes | Yes | Yes | 6 |
| Del Brutto (2005)    | Yes | 8 |
| Dent (2005)          | Yes | 8 |
| Druet-Cabanac (1998) | Yes | Yes | NC  | NC  | NC  | NR  | NR  | NR  | 2 |
| Durkin (1992)        | Yes | Yes | Yes | Yes | Yes | NC  | Yes | Yes | 7 |
| Edwards (2008)       | Yes | Yes | NR  | Yes | Yes | Yes | Yes | Yes | 7 |
| El Tallawy (2010)    | Yes | Yes | NR  | NR  | Yes | Yes | Yes | No  | 5 |
| El Tallawy (2013)    | Yes | 8 |
| El Tallawy (2013)    | Yes | No  | 7 |
| Elliott (2008)       | Yes | Yes | NR  | NR  | Yes | Yes | NR  | Yes | 5 |

|                        |     |     |     |     |     |     |     |     |   |
|------------------------|-----|-----|-----|-----|-----|-----|-----|-----|---|
| Endziniene (1997)      | Yes | Yes | NR  | NR  | NC  | No  | Yes | No  | 3 |
| Eriksson (1997)        | Yes | Yes | Yes | Yes | Yes | NC  | Yes | No  | 6 |
| Faught (2012)          | Yes | Yes | NA  | NA  | Yes | Yes | Yes | Yes | 6 |
| Ferguson (2008)        | Yes | Yes | No  | No  | Yes | Yes | NR  | Yes | 5 |
| Fong (2003)            | Yes | Yes | NR  | NR  | Yes | No  | Yes | No  | 4 |
| Fong (2008)            | Yes | Yes | No  | No  | Yes | Yes | Yes | Yes | 6 |
| Forsgren (1992)        | Yes | Yes | Yes | No  | Yes | No  | Yes | Yes | 6 |
| Fuller-Thomson (2009)  | Yes | Yes | Yes | No  | Yes | Yes | No  | Yes | 6 |
| Gaitatzis (2004)       | Yes | Yes | Yes | Yes | Yes | Yes | NC  | Yes | 7 |
| Gallitto (2005)        | Yes | Yes | Yes | Yes | Yes | NC  | Yes | Yes | 7 |
| Garcia-Noval (2001)    | Yes | Yes | NR  | NR  | Yes | Yes | Yes | No  | 5 |
| Gill (2001)            | Yes | Yes | Yes | Yes | Yes | Yes | NC  | No  | 6 |
| Goel (2009)            | Yes | Yes | NR  | NR  | Yes | Yes | NR  | No  | 4 |
| Gomes (2002)           | Yes | Yes | Yes | Yes | Yes | NC  | Yes | No  | 6 |
| Gracia (1990)          | Yes | Yes | Yes | NR  | Yes | Yes | Yes | Yes | 7 |
| Guekht (2010)          | Yes | Yes | NR  | NR  | Yes | NC  | Yes | Yes | 5 |
| Hackett (1997)         | Yes | Yes | NR  | Yes | Yes | Yes | NC  | Yes | 6 |
| Hinnell (2010)         | Yes | Yes | Yes | NC  | Yes | Yes | Yes | No  | 6 |
| Houinato (2013)        | Yes | Yes | NA  | NA  | Yes | Yes | Yes | Yes | 6 |
| Hunter (2012)          | Yes | 8 |
| Huseyinoglu (2011)     | Yes | 8 |
| JAMA (1994)            | Yes | Yes | NR  | NR  | Yes | Yes | Yes | Yes | 6 |
| Josipovic-Jelic (2011) | Yes | Yes | NA  | NA  | Yes | Yes | Yes | Yes | 6 |
| Kaamugisha (1988)      | Yes | Yes | NC  | Yes | Yes | Yes | Yes | No  | 6 |
| Karaagac (2001)        | Yes | No  | 7 |
| Karabiber (2001)       | Yes | Yes | NR  | NR  | Yes | Yes | Yes | No  | 5 |
| Kelvin (2007)          | Yes | Yes | No  | Yes | Yes | Yes | Yes | Yes | 7 |









|                |     |     |     |     |     |     |     |     |   |
|----------------|-----|-----|-----|-----|-----|-----|-----|-----|---|
| (2000)         |     |     |     |     |     |     |     |     |   |
| Wallace (1998) | Yes | 8 |
| Wang (2003)    | Yes | No  | 7 |
| Wang (2008)    | Yes | No  | 7 |
| Wiebe (1999)   | Yes | Yes | Yes | No  | Yes | Yes | Yes | No  | 6 |
| Winkler (2009) | Yes | No  | 7 |
| Wong (2004)    | Yes | No  | 7 |
| Wright (2000)  | Yes | No  | 7 |
| Yemadje (2012) | Yes | 8 |
| Zaid (2008)    | Yes | No  | 7 |
| Zhao (2008)    | Yes | Yes | Yes | NC  | Yes | Yes | Yes | No  | 6 |

Note: NC=Not Clear; NR= Not Reported
