# Supplementary material
Source: PubMed Central journal article supplement (PMC5272794)
Supplement: supp_WNL.0000000000003509_table_e4.pdf [file supp_WNL.0000000000003509_table_e4.pdf]

Table e-4. Incidence Studies Quality Assessment

| Study (Year)       | Q1: Target population described? | Q2: Cases from entire population or probability sampling? | Q3: Response rate >70%? | Q4: Non-responders clearly described? | Q5: Sample representative of population? | Q6: Data collection methods standardized? | Q7: Validated criteria to assess disease? | Q8: Were estimates given with confidence intervals or subgroups? | Total Quality Score (/8) |
|--------------------|----------------------------------|-----------------------------------------------------------|-------------------------|---------------------------------------|------------------------------------------|-------------------------------------------|-------------------------------------------|------------------------------------------------------------------|--------------------------|
| Adelow (2009)      | Yes                              | Yes                                                       | NR                      | NR                                    | Yes                                      | Yes                                       | Yes                                       | Yes                                                              | 6                        |
| Annegers (1999)    | Yes                              | Yes                                                       | NC                      | No                                    | Yes                                      | NC                                        | Yes                                       | No                                                               | 4                        |
| Astradsson (1998)  | Yes                              | Yes                                                       | Yes                     | Yes                                   | Yes                                      | NC                                        | Yes                                       | No                                                               | 6                        |
| Beilmann (1999)    | Yes                              | Yes                                                       | NR                      | NR                                    | Yes                                      | NC                                        | Yes                                       | Yes                                                              | 5                        |
| Benn (2008)        | Yes                              | Yes                                                       | NR                      | NR                                    | Yes                                      | No                                        | Yes                                       | Yes                                                              | 5                        |
| Casetta (2012)     | Yes                              | Yes                                                       | NA                      | NR                                    | Yes                                      | Yes                                       | Yes                                       | Yes                                                              | 6                        |
| Celikkas (2010)    | Yes                              | Yes                                                       | NR                      | NR                                    | Yes                                      | NC                                        | Yes                                       | No                                                               | 4                        |
| Christensen (2007) | Yes                              | Yes                                                       | Yes                     | Yes                                   | Yes                                      | Yes                                       | Yes                                       | No                                                               | 7                        |
| Doerfer (1987)     | No                               | Yes                                                       | Yes                     | Yes                                   | Yes                                      | NC                                        | Yes                                       | No                                                               | 5                        |
| Dura-Trave (2008)  | Yes                              | Yes                                                       | Yes                     | Yes                                   | Yes                                      | NR                                        | Yes                                       | Yes                                                              | 7                        |
| El Tallawy (2010)  | Yes                              | Yes                                                       | Yes                     | NA                                    | Yes                                      | Yes                                       | Yes                                       | Yes                                                              | 7                        |
| El Tallway (2013)  | Yes                              | Yes                                                       | Yes                     | Yes                                   | Yes                                      | Yes                                       | Yes                                       | Yes                                                              | 8                        |
| El Tallway (2013)  | Yes                              | Yes                                                       | Yes                     | Yes                                   | Yes                                      | Yes                                       | Yes                                       | No                                                               | 7                        |
| Eltze (2013)       | Yes                              | Yes                                                       | NA                      | NA                                    | Yes                                      | Yes                                       | Yes                                       | Yes                                                              | 6                        |
| Faught (2012)      | Yes                              | Yes                                                       | NA                      | NA                                    | Yes                                      | Yes                                       | Yes                                       | Yes                                                              | 6                        |
| Freitag (2001)     | Yes                              | Yes                                                       | Yes                     | Yes                                   | Yes                                      | NC                                        | Yes                                       | Yes                                                              | 7                        |
| Gissler (1998)     | Yes                              | Yes                                                       | Yes                     | Yes                                   | Yes                                      | Yes                                       | Yes                                       | No                                                               | 7                        |
| Heaney (2002)      | Yes                              | Yes                                                       | Yes                     | Yes                                   | Yes                                      | Yes                                       | Yes                                       | Yes                                                              | 8                        |
| Houinato (2013)    | Yes                              | Yes                                                       | Yes                     | Yes                                   | Yes                                      | Yes                                       | Yes                                       | Yes                                                              | 8                        |
| Hussain (2006)     | Yes                              | Yes                                                       | Yes                     | Yes                                   | Yes                                      | Yes                                       | Yes                                       | Yes                                                              | 8                        |

|                       |     |     |     |     |     |     |     |     |   |
|-----------------------|-----|-----|-----|-----|-----|-----|-----|-----|---|
| Kaiser (2006)         | Yes | No  | 7 |
| Khedr (2013)          | Yes | Yes | NA  | NA  | Yes | Yes | Yes | Yes | 6 |
| Kotsopoulos (2005)    | Yes | Yes | NR  | NR  | Yes | Yes | NC  | Yes | 5 |
| Larsson (2006)        | Yes | Yes | NR  | NR  | NC  | Yes | Yes | No  | 4 |
| Lavados (1992)        | Yes | Yes | Yes | Yes | Yes | No  | Yes | No  | 5 |
| MacDonald (2000)      | Yes | 8 |
| Mani (1998)           | Yes | Yes | NR  | NR  | NC  | Yes | Yes | No  | 4 |
| Martinez (2009)       | Yes | Yes | NR  | NR  | NC  | Yes | Yes | Yes | 5 |
| Medina (2005)         | Yes | Yes | Yes | No  | Yes | Yes | Yes | Yes | 7 |
| Mung'ala-Odera (2008) | Yes | Yes | NC  | NC  | Yes | Yes | Yes | Yes | 6 |
| Ngugi (2013)          | Yes | 8 |
| Olafsson (1996)       | Yes | 8 |
| Olafsson (2005)       | Yes | 8 |
| Oun (2003)            | Yes | Yes | NC  | Yes | Yes | Yes | Yes | Yes | 7 |
| Pavlovic (1998)       | Yes | Yes | NR  | NR  | NC  | Yes | Yes | Yes | 5 |
| Placencia (1992)      | Yes | Yes | Yes | NA  | Yes | Yes | Yes | Yes | 7 |
| Rwiza (1992)          | Yes | Yes | NR  | NR  | NC  | Yes | Yes | No  | 4 |
| Rwiza (1994)          | Yes | Yes | NR  | NR  | NC  | NC  | NC  | No  | 1 |
| Saha (2008)           | Yes | No  | 7 |
| Shackleton (1997)     | Yes | No  | 7 |
| Sillanpaa (2006)      | Yes | 8 |
| Sillanpaa (2011)      | Yes | 8 |
| Stranjalis (2009)     | Yes | Yes | NR  | NR  | Yes | Yes | Yes | No  | 5 |
| Tallis (1991)         | Yes | No  | 7 |
| Villaran (2009)       | Yes | No  | 7 |
| Wallace (1998)        | Yes | 8 |

|                   |     |     |     |     |     |     |     |     |   |
|-------------------|-----|-----|-----|-----|-----|-----|-----|-----|---|
| Winkler<br>(2009) | Yes | No  | 7 |
| Wirrell<br>(2011) | Yes | Yes | NR  | NR  | NC  | Yes | Yes | Yes | 5 |

Note: NC= Not Clear; NR= Not Reported; NA= Not Applicable
