# Supplementary material
Source: PubMed Central journal article supplement (PMC5272794)

Figure e-2. Lifetime Prevalence of Epilepsy

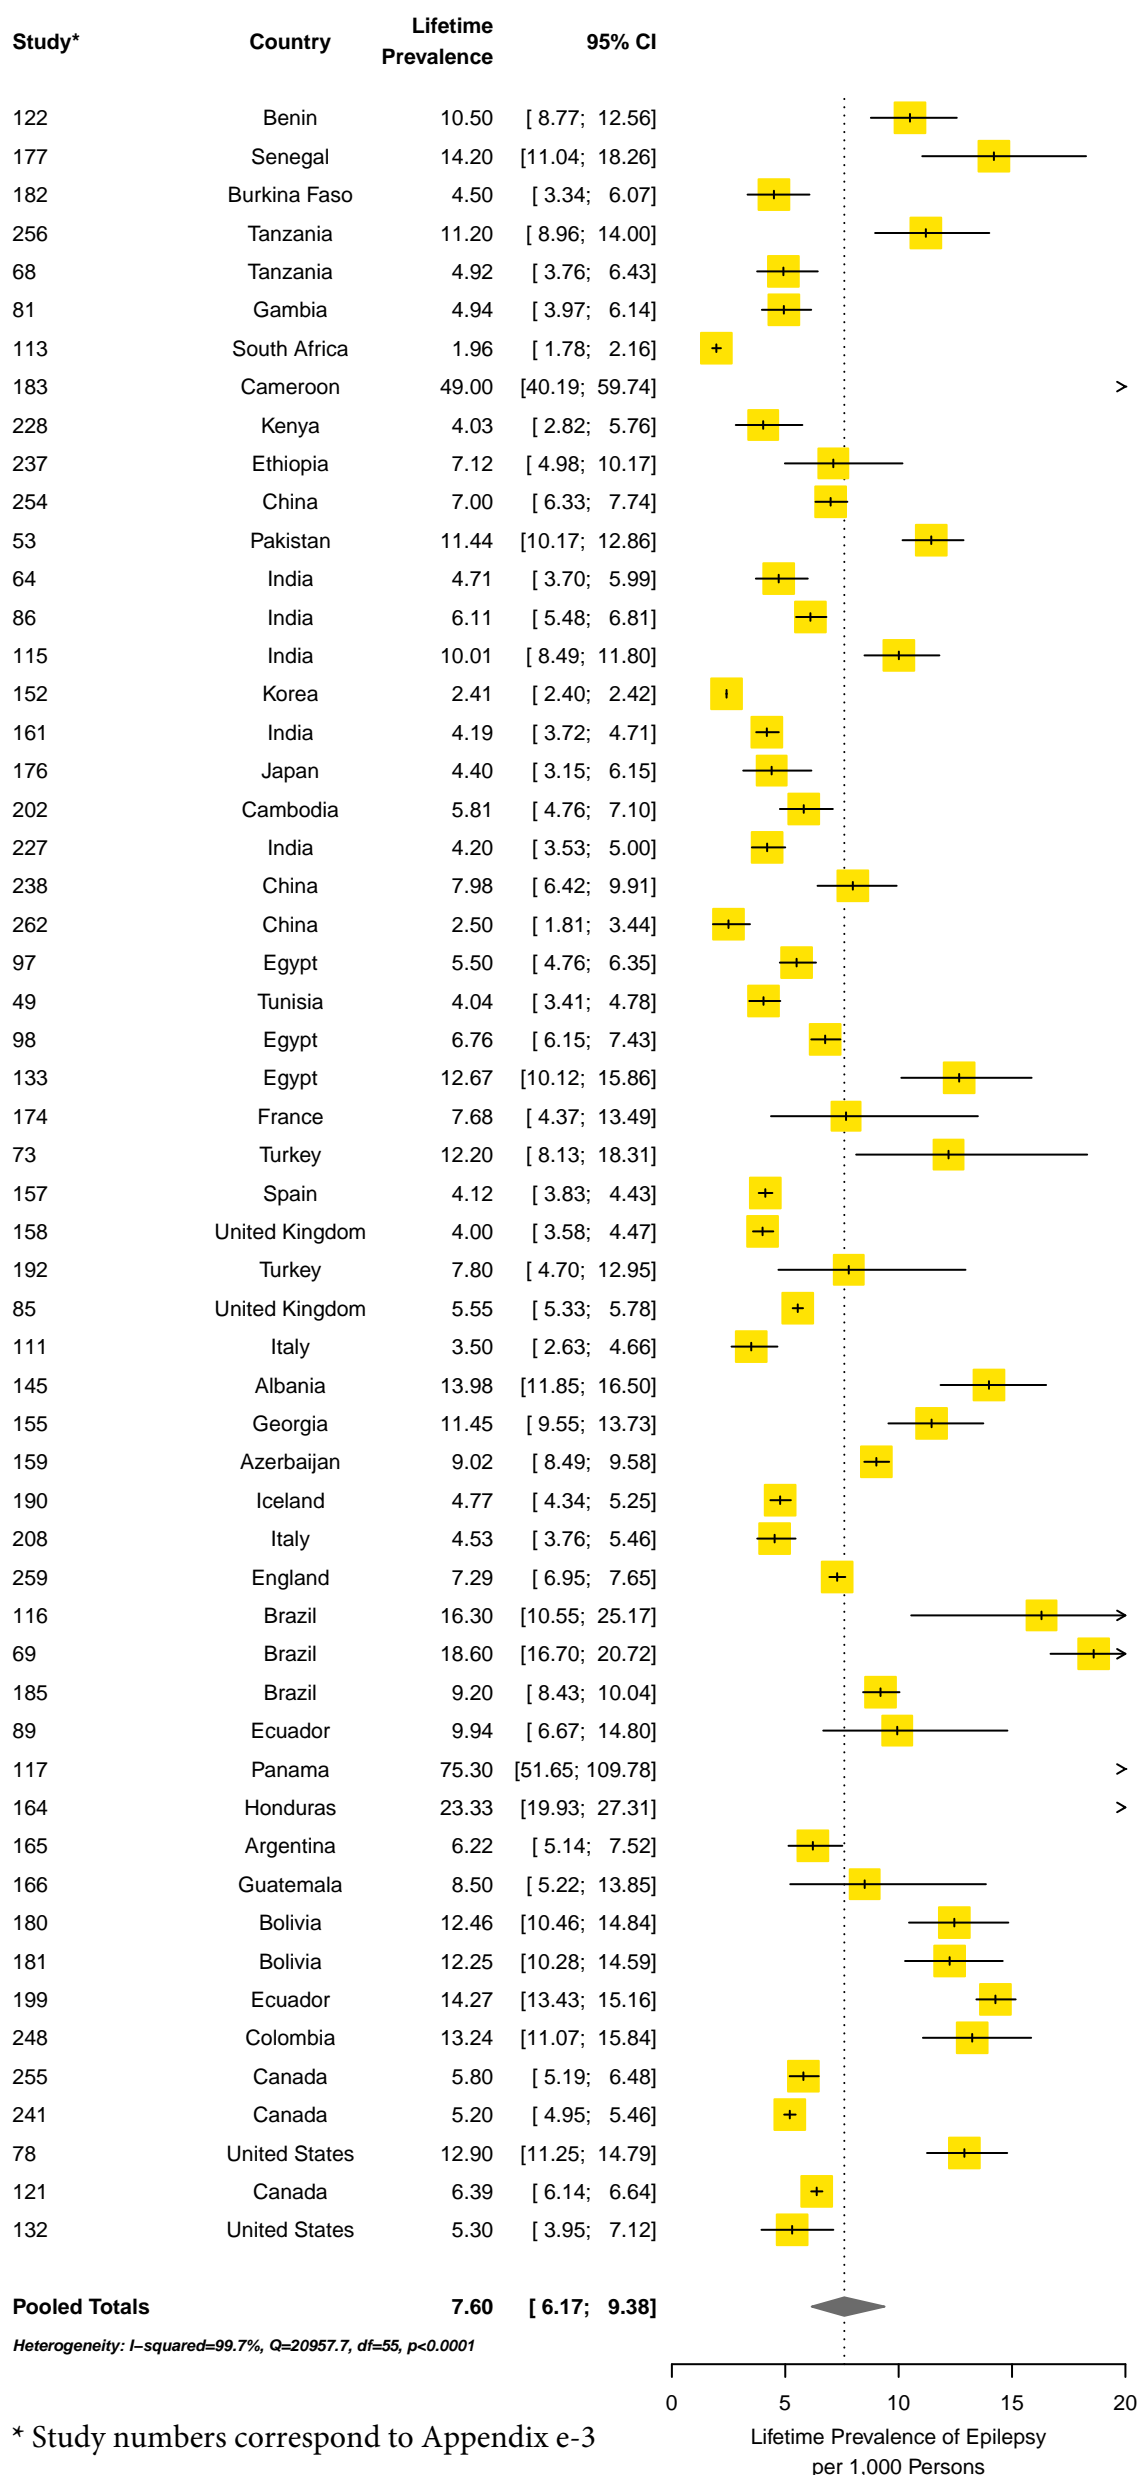

\* Study numbers correspond to Appendix e-3

Supplement: supp_WNL.0000000000003509_figure_e2.pdf [file supp_WNL.0000000000003509_figure_e2.pdf]

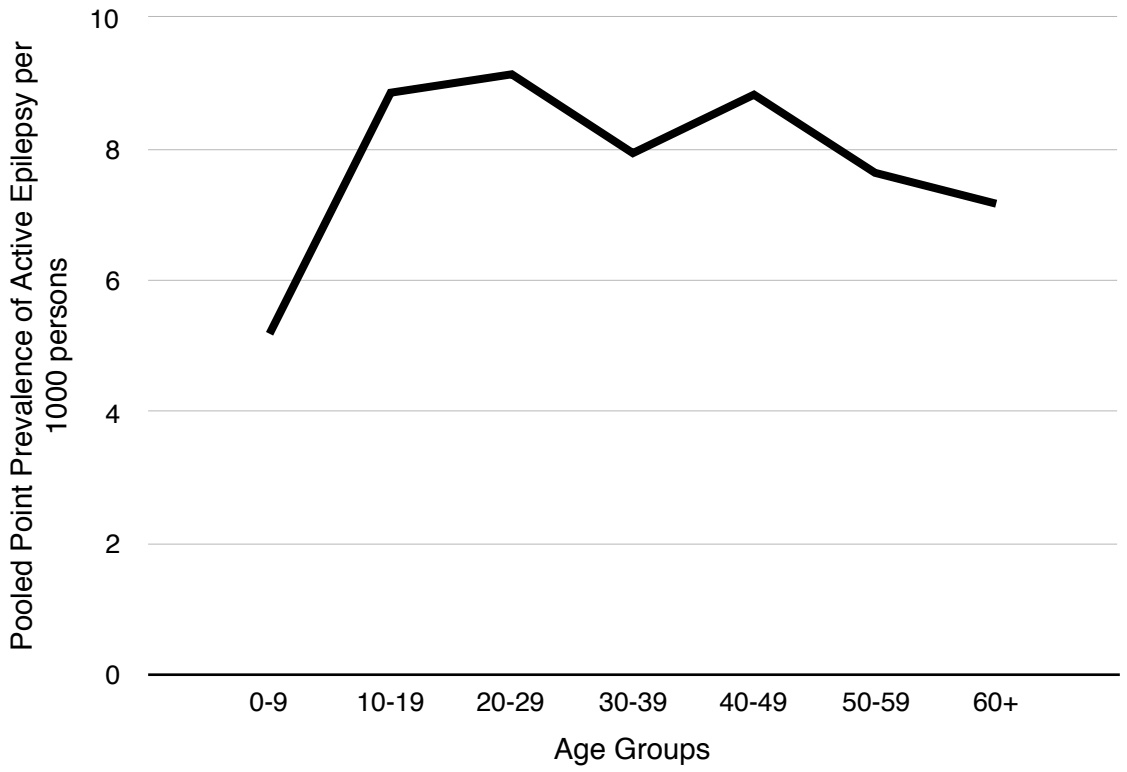

Figure e-3: Age distribution of estimates of point prevalence of active epilepsy.

Supplement: supp_WNL.0000000000003509_figure_e3.pdf [file supp_WNL.0000000000003509_figure_e3.pdf]
